# Supplementary material for: The Bonding Situation in Metalated Ylides
Source: PubMed Central journal article supplement — Chemistry. 2017 Mar 7;23(18):4422–34. doi: 10.1002/chem.201605997 (PMC5396261; doi:10.1002/chem.201605997), 2017-03-07
Supplement: CHEM-23-4422-s001.pdf [file CHEM-23-4422-s001.pdf]

# CHEMISTRY

## A **European** Journal

### Supporting Information

#### **The Bonding Situation in Metalated Ylides**

Lennart T. Scharf,<sup>[a]</sup> Diego M. Andrada,<sup>[b]</sup> Gernot Frenking,<sup>[b]</sup> and Viktoria H. Gessner\*<sup>[a]</sup>

chem\_201605997\_sm\_miscellaneous\_information.pdf

**Index**

|                                                        |     |
|--------------------------------------------------------|-----|
| 1. Coordinates and Energies                            | S2  |
| 1.1. Equilibrium structures                            | S2  |
| 1.2. Linear Structures                                 | S12 |
| 1.3. 150° structures                                   | S21 |
| 1.4. Dissociation structures                           | S29 |
| 2. Canonical Orbitals                                  | S36 |
| 3. EDA Tables                                          | S39 |
| 4. Nalewajski-Mrozek bond orders and NBO analysis data | S42 |

## 1. Coordinates and Energies

### 1.1 BP86-D3(BJ)/Def2TZVP, equilibrium structures

All Energies are given in Hartree.

1

E = -1871.86371102

| Atomic symbol | x         | y         | z         |
|---------------|-----------|-----------|-----------|
| C             | 0.271893  | 0.330973  | -1.509916 |
| P             | -0.749844 | -0.103195 | -0.231516 |
| C             | -2.248604 | 0.931970  | -0.083213 |
| C             | -2.534231 | 1.821538  | -1.126967 |
| C             | -3.106555 | 0.855921  | 1.024565  |
| C             | -3.675276 | 2.624188  | -1.065938 |
| H             | -1.845814 | 1.883001  | -1.972678 |
| C             | -4.245479 | 1.660534  | 1.082274  |
| H             | -2.873635 | 0.186998  | 1.855003  |
| C             | -4.532350 | 2.543173  | 0.035226  |
| H             | -3.889985 | 3.321165  | -1.877902 |
| H             | -4.907259 | 1.604234  | 1.948736  |
| H             | -5.421585 | 3.174637  | 0.083605  |
| C             | -0.047897 | -0.154451 | 1.451527  |
| C             | 0.650201  | -1.294749 | 1.881689  |
| C             | -0.014659 | 1.013310  | 2.234498  |
| C             | 1.353690  | -1.276321 | 3.087943  |
| H             | 0.639736  | -2.197162 | 1.267563  |
| C             | 0.695102  | 1.027767  | 3.436373  |
| H             | -0.520314 | 1.912392  | 1.883661  |
| C             | 1.377721  | -0.115508 | 3.868398  |
| H             | 1.880582  | -2.172687 | 3.422090  |
| H             | 0.717061  | 1.938323  | 4.038066  |
| H             | 1.923269  | -0.101988 | 4.814023  |
| C             | -1.331689 | -1.802463 | -0.539267 |
| C             | -2.125116 | -2.488921 | 0.392569  |
| C             | -0.983386 | -2.418954 | -1.747768 |
| C             | -2.564492 | -3.784327 | 0.116384  |
| H             | -2.392485 | -2.017305 | 1.339623  |
| C             | -1.426331 | -3.715738 | -2.021164 |
| H             | -0.364352 | -1.852163 | -2.448270 |
| C             | -2.216157 | -4.398981 | -1.091771 |
| H             | -3.180671 | -4.315951 | 0.843942  |
| H             | -1.155071 | -4.193619 | -2.964618 |
| H             | -2.562974 | -5.411594 | -1.307228 |
| S             | 1.196192  | 1.706350  | -1.371511 |
| O             | 0.901761  | 2.648324  | -0.272418 |
| O             | 1.512185  | 2.295342  | -2.675863 |
| C             | 2.606258  | 0.757558  | -0.865854 |
| C             | 3.373933  | 0.040379  | -1.825537 |
| C             | 2.974318  | 0.655819  | 0.502242  |
| C             | 4.384842  | -0.780725 | -1.413633 |
| H             | 3.143963  | 0.154802  | -2.883992 |
| C             | 3.986886  | -0.185446 | 0.873944  |
| H             | 2.445605  | 1.244864  | 1.249244  |
| H             | 5.011544  | -1.357401 | -2.091818 |
| H             | 4.308050  | -0.315439 | 1.905930  |
| H             | 5.430420  | -1.510968 | 0.218634  |
| N             | 4.667889  | -0.908062 | -0.071440 |

**1'**

E = -1871.87660585

| Atomic symbol | x         | y         | z         |
|---------------|-----------|-----------|-----------|
| C             | -0.065228 | -0.209977 | -1.697312 |
| P             | 0.802990  | 0.078072  | -0.281942 |
| C             | 2.088239  | -1.155387 | 0.134436  |
| C             | 2.351163  | -2.164062 | -0.800532 |
| C             | 2.812406  | -1.111882 | 1.335802  |
| C             | 3.334776  | -3.120328 | -0.537787 |
| H             | 1.769432  | -2.191380 | -1.724177 |
| C             | 3.793357  | -2.069545 | 1.596183  |
| H             | 2.600614  | -0.340823 | 2.078637  |
| C             | 4.056986  | -3.073684 | 0.657689  |
| H             | 3.531727  | -3.907978 | -1.267188 |
| H             | 4.351660  | -2.035234 | 2.533738  |
| H             | 4.823523  | -3.823361 | 0.863256  |
| C             | -0.170260 | 0.269484  | 1.252967  |
| C             | -0.838419 | 1.481504  | 1.499244  |
| C             | -0.419102 | -0.834775 | 2.086447  |
| C             | -1.715888 | 1.596527  | 2.577279  |
| H             | -0.662013 | 2.336146  | 0.843350  |
| C             | -1.298645 | -0.714824 | 3.166148  |
| H             | 0.071998  | -1.785876 | 1.879340  |
| C             | -1.944162 | 0.500602  | 3.418210  |
| H             | -2.221417 | 2.545637  | 2.765598  |
| H             | -1.474228 | -1.573811 | 3.817218  |
| H             | -2.620770 | 0.595625  | 4.269869  |
| C             | 1.679023  | 1.663402  | -0.471891 |
| C             | 2.300162  | 2.302468  | 0.611787  |
| C             | 1.746422  | 2.232651  | -1.750115 |
| C             | 2.985133  | 3.502679  | 0.416038  |
| H             | 2.234922  | 1.874261  | 1.613498  |
| C             | 2.437664  | 3.431306  | -1.942867 |
| H             | 1.237497  | 1.715873  | -2.567873 |
| C             | 3.057262  | 4.066717  | -0.862488 |
| H             | 3.462747  | 4.000121  | 1.262240  |
| H             | 2.490081  | 3.872233  | -2.940202 |
| H             | 3.594871  | 5.004770  | -1.014181 |
| S             | -1.176562 | -1.413634 | -1.670471 |
| O             | -1.097189 | -2.456970 | -0.601572 |
| O             | -1.550866 | -1.887870 | -3.003536 |
| C             | -2.603308 | -0.476244 | -1.084312 |
| C             | -3.167243 | 0.648475  | -1.701415 |
| C             | -4.169765 | 1.345855  | -1.048449 |
| H             | -2.781734 | 0.944903  | -2.675882 |
| C             | -4.013421 | -0.157000 | 0.824372  |
| H             | -2.582867 | -1.683627 | 0.502164  |
| H             | -4.630251 | 2.213980  | -1.522588 |
| H             | -4.257511 | -0.526945 | 1.817515  |
| H             | -5.354830 | 1.503415  | 0.786036  |
| C             | -4.590804 | 0.948315  | 0.244843  |
| N             | -3.070993 | -0.849400 | 0.133068  |

**1''**

E = -1871.8755977

| Atomic symbol | x        | y         | z         |
|---------------|----------|-----------|-----------|
| C             | 0.013321 | -0.206941 | -1.708616 |
| P             | 0.860617 | 0.036126  | -0.290518 |
| C             | 1.995232 | -1.323009 | 0.157932  |

|   |           |           |           |
|---|-----------|-----------|-----------|
| C | 1.704814  | -2.611379 | -0.313207 |
| C | 3.112503  | -1.113507 | 0.980769  |
| C | 2.522897  | -3.684141 | 0.050849  |
| H | 0.838656  | -2.766222 | -0.960418 |
| C | 3.930471  | -2.187966 | 1.333991  |
| H | 3.351887  | -0.110323 | 1.336626  |
| C | 3.634495  | -3.474900 | 0.871976  |
| H | 2.291678  | -4.686323 | -0.314620 |
| H | 4.803608  | -2.020027 | 1.967237  |
| H | 4.276263  | -4.313782 | 1.148010  |
| C | -0.134058 | 0.321589  | 1.208590  |
| C | -0.897709 | 1.498498  | 1.294600  |
| C | -0.257804 | -0.660784 | 2.200917  |
| C | -1.768029 | 1.689670  | 2.365697  |
| H | -0.813703 | 2.255439  | 0.512813  |
| C | -1.129638 | -0.462379 | 3.275104  |
| H | 0.325811  | -1.579835 | 2.130132  |
| C | -1.883741 | 0.710243  | 3.358822  |
| H | -2.373574 | 2.595266  | 2.418874  |
| H | -1.221177 | -1.229445 | 4.046278  |
| H | -2.571508 | 0.860760  | 4.192605  |
| C | 1.894816  | 1.519252  | -0.465537 |
| C | 2.348023  | 2.238979  | 0.650395  |
| C | 2.257792  | 1.926618  | -1.756475 |
| C | 3.170220  | 3.354176  | 0.473182  |
| H | 2.038667  | 1.942125  | 1.654409  |
| C | 3.083088  | 3.039241  | -1.928019 |
| H | 1.867046  | 1.368721  | -2.610582 |
| C | 3.541680  | 3.751771  | -0.814845 |
| H | 3.514764  | 3.918081  | 1.341895  |
| H | 3.363786  | 3.356259  | -2.934041 |
| H | 4.182197  | 4.625067  | -0.951686 |
| S | -1.303745 | -1.061582 | -1.805990 |
| O | -1.436339 | -2.513522 | -1.566812 |
| C | -2.670207 | -0.303981 | -0.908756 |
| C | -4.087443 | 1.562977  | -0.430756 |
| H | -2.688758 | 1.511288  | -2.092338 |
| C | -4.159326 | -0.253139 | 0.961952  |
| H | -2.880176 | -1.948573 | 0.478723  |
| H | -4.470468 | 2.560560  | -0.667395 |
| H | -4.584423 | -0.715976 | 1.857777  |
| C | -3.204992 | -0.944393 | 0.208440  |
| C | -3.107703 | 0.982803  | -1.235542 |
| N | -4.611224 | 0.972946  | 0.659536  |
| O | -1.817472 | -0.818332 | -3.354530 |
| H | -2.443069 | -1.551213 | -3.535481 |

2

E = -1855.30469091

| Atomic symbol | x         | y         | z         |
|---------------|-----------|-----------|-----------|
| C             | 0.036179  | 0.115021  | -1.770062 |
| P             | -0.792225 | -0.021126 | -0.350781 |
| C             | -1.895553 | 1.357607  | 0.219963  |
| C             | -1.499102 | 2.662376  | -0.117451 |
| C             | -3.093631 | 1.163271  | 0.925786  |
| C             | -2.282229 | 3.752897  | 0.272092  |
| H             | -0.574019 | 2.801150  | -0.691492 |
| C             | -3.881950 | 2.256314  | 1.298530  |
| H             | -3.420088 | 0.153016  | 1.178208  |

|   |           |           |           |
|---|-----------|-----------|-----------|
| C | -3.474182 | 3.555338  | 0.978304  |
| H | -1.960735 | 4.764909  | 0.013539  |
| H | -4.817422 | 2.092851  | 1.840119  |
| H | -4.088933 | 4.410182  | 1.271461  |
| C | 0.130880  | -0.425070 | 1.188487  |
| C | 0.914813  | -1.593086 | 1.183705  |
| C | 0.214016  | 0.446105  | 2.283703  |
| C | 1.746928  | -1.889525 | 2.260196  |
| H | 0.882945  | -2.247807 | 0.310432  |
| C | 1.050620  | 0.147139  | 3.363792  |
| H | -0.374644 | 1.365198  | 2.284868  |
| C | 1.814880  | -1.022232 | 3.357474  |
| H | 2.366768  | -2.788009 | 2.234220  |
| H | 1.110139  | 0.835815  | 4.210356  |
| H | 2.478818  | -1.249439 | 4.194630  |
| C | -1.936259 | -1.446139 | -0.512918 |
| C | -2.429131 | -2.155991 | 0.591422  |
| C | -2.306526 | -1.837489 | -1.806448 |
| C | -3.291573 | -3.242182 | 0.404130  |
| H | -2.115587 | -1.873546 | 1.598897  |
| C | -3.177549 | -2.912318 | -1.992057 |
| H | -1.858403 | -1.289165 | -2.641235 |
| C | -3.672854 | -3.617793 | -0.886964 |
| H | -3.660377 | -3.799633 | 1.268726  |
| H | -3.464546 | -3.211152 | -3.003307 |
| H | -4.345832 | -4.466240 | -1.033853 |
| S | 1.372105  | 1.064363  | -2.001155 |
| O | 1.283909  | 2.476939  | -1.532540 |
| O | 1.882734  | 0.905660  | -3.376159 |
| C | 2.665364  | 0.343856  | -0.952575 |
| C | 3.241928  | -0.880611 | -1.315077 |
| C | 3.056594  | 0.974603  | 0.232976  |
| C | 4.210023  | -1.464800 | -0.497614 |
| H | 2.919198  | -1.354800 | -2.243439 |
| C | 4.019973  | 0.381457  | 1.054209  |
| H | 2.596163  | 1.929478  | 0.488833  |
| H | 4.662291  | -2.417571 | -0.786558 |
| H | 4.309620  | 0.869583  | 1.988067  |
| H | 5.355405  | -1.298559 | 1.336044  |
| C | 4.604306  | -0.835412 | 0.691610  |

3

E = -1379.70195405

| Atomic symbol | x         | y         | z         |
|---------------|-----------|-----------|-----------|
| C             | -1.282309 | 0.676614  | 0.000001  |
| P             | 0.261315  | 0.145524  | -0.000000 |
| C             | 1.185701  | 0.789842  | 1.454709  |
| C             | 0.533393  | 1.705469  | 2.288340  |
| C             | 2.503955  | 0.409526  | 1.747459  |
| C             | 1.188313  | 2.238544  | 3.400940  |
| H             | -0.495193 | 1.977030  | 2.034951  |
| C             | 3.159628  | 0.942052  | 2.859747  |
| H             | 3.017385  | -0.319513 | 1.118638  |
| C             | 2.503609  | 1.859297  | 3.687454  |
| H             | 0.671470  | 2.950825  | 4.047574  |
| H             | 4.184439  | 0.638567  | 3.083215  |
| H             | 3.017337  | 2.274817  | 4.556690  |
| C             | 1.185699  | 0.789844  | -1.454710 |
| C             | 2.503953  | 0.409530  | -1.747462 |

|   |           |           |           |
|---|-----------|-----------|-----------|
| C | 0.533388  | 1.705471  | -2.288340 |
| C | 3.159624  | 0.942058  | -2.859750 |
| H | 3.017385  | -0.319509 | -1.118641 |
| C | 1.188308  | 2.238548  | -3.400940 |
| H | -0.495197 | 1.977030  | -2.034949 |
| C | 2.503603  | 1.859303  | -3.687456 |
| H | 4.184435  | 0.638574  | -3.083219 |
| H | 0.671462  | 2.950828  | -4.047573 |
| H | 3.017330  | 2.274824  | -4.556691 |
| C | 0.716069  | -1.642904 | -0.000001 |
| C | 0.789610  | -2.353450 | 1.209699  |
| C | 0.789604  | -2.353450 | -1.209702 |
| C | 0.943761  | -3.741646 | 1.209921  |
| H | 0.728525  | -1.811864 | 2.156198  |
| C | 0.943754  | -3.741647 | -1.209924 |
| H | 0.728513  | -1.811866 | -2.156201 |
| C | 1.020565  | -4.440003 | -0.000001 |
| H | 1.006334  | -4.280677 | 2.157567  |
| H | 1.006322  | -4.280679 | -2.157570 |
| H | 1.143520  | -5.524657 | -0.000001 |
| C | -4.885148 | 0.671301  | 0.000004  |
| C | -4.653159 | -0.668803 | 0.000001  |
| H | -5.818624 | 1.221216  | 0.000005  |
| H | -5.344936 | -1.502720 | 0.000001  |
| C | -2.602678 | 0.371542  | 0.000002  |
| N | -3.274415 | -0.856610 | -0.000000 |
| N | -3.651254 | 1.309274  | 0.000004  |
| C | -3.420943 | 2.734785  | 0.000006  |
| H | -2.328838 | 2.869680  | 0.000006  |
| H | -3.849309 | 3.208214  | -0.897476 |
| H | -3.849308 | 3.208211  | 0.897491  |
| C | -2.583666 | -2.122945 | -0.000003 |
| H | -1.939110 | -2.214940 | -0.887256 |
| H | -1.939109 | -2.214944 | 0.887249  |
| H | -3.322698 | -2.933221 | -0.000005 |

4

E = -1339.81565116

| Atomic symbol | x         | y         | z         |
|---------------|-----------|-----------|-----------|
| C             | 1.020595  | 1.362694  | -0.235510 |
| P             | -0.211379 | 0.269696  | -0.054884 |
| C             | -0.289403 | -0.745126 | 1.512339  |
| C             | 0.369808  | -0.211971 | 2.627805  |
| C             | -0.927630 | -1.987516 | 1.627445  |
| C             | 0.375951  | -0.897642 | 3.843505  |
| H             | 0.890275  | 0.742571  | 2.503168  |
| C             | -0.924815 | -2.677686 | 2.844302  |
| H             | -1.411870 | -2.426131 | 0.751400  |
| C             | -0.275902 | -2.132007 | 3.956646  |
| H             | 0.901218  | -0.477179 | 4.705261  |
| H             | -1.425048 | -3.646959 | 2.924164  |
| H             | -0.268092 | -2.672785 | 4.906587  |
| C             | -0.434609 | -1.050855 | -1.322938 |
| C             | -1.403460 | -0.975249 | -2.339430 |
| C             | 0.552276  | -2.057950 | -1.398519 |
| C             | -1.411304 | -1.897128 | -3.388687 |
| H             | -2.158110 | -0.186276 | -2.302967 |
| C             | 0.545580  | -2.970567 | -2.454517 |
| H             | 1.345873  | -2.071243 | -0.646029 |

|   |           |           |           |
|---|-----------|-----------|-----------|
| C | -0.438345 | -2.903766 | -3.449729 |
| H | -2.181416 | -1.832328 | -4.162462 |
| H | 1.320035  | -3.740883 | -2.504946 |
| H | -0.441975 | -3.624049 | -4.271695 |
| C | -1.803347 | 1.162050  | -0.037706 |
| C | -3.016026 | 0.524560  | 0.272101  |
| C | -1.801290 | 2.531824  | -0.333525 |
| C | -4.214475 | 1.248852  | 0.268575  |
| H | -3.022616 | -0.539319 | 0.516909  |
| C | -2.996068 | 3.253728  | -0.335881 |
| H | -0.823860 | 2.978472  | -0.546888 |
| C | -4.209364 | 2.612146  | -0.037690 |
| H | -5.154481 | 0.745935  | 0.510552  |
| H | -2.987367 | 4.321707  | -0.569805 |
| H | -5.145403 | 3.176791  | -0.039097 |
| C | 4.256762  | -0.188881 | 0.018780  |
| C | 4.623520  | 1.117259  | -0.233799 |
| H | 4.917368  | -1.041012 | 0.176942  |
| H | 5.589387  | 1.604836  | -0.331663 |
| C | 2.359966  | 0.915166  | -0.182633 |
| N | 3.430446  | 1.813046  | -0.367342 |
| N | 2.891528  | -0.326872 | 0.051915  |
| C | 3.268006  | 3.218559  | -0.634222 |
| H | 2.180582  | 3.384993  | -0.704568 |
| H | 3.681640  | 3.841707  | 0.179370  |
| H | 3.752163  | 3.509529  | -1.583251 |

## 5

E = -1935.65844227

| Atomic symbol | x         | y         | z         |
|---------------|-----------|-----------|-----------|
| C             | -0.249573 | 1.136750  | -0.312061 |
| P             | 1.212138  | 0.381647  | -0.090721 |
| C             | 1.363523  | -0.682243 | 1.392302  |
| C             | 0.846645  | -1.990492 | 1.379587  |
| C             | 1.747879  | -0.111014 | 2.617945  |
| C             | 0.709120  | -2.705792 | 2.570272  |
| H             | 0.526582  | -2.440826 | 0.439016  |
| C             | 1.607655  | -0.829184 | 3.807530  |
| H             | 2.146762  | 0.905197  | 2.635205  |
| C             | 1.083495  | -2.126846 | 3.787529  |
| H             | 0.296446  | -3.715828 | 2.545340  |
| H             | 1.907781  | -0.374710 | 4.753865  |
| H             | 0.969277  | -2.685548 | 4.718208  |
| C             | 2.568432  | 1.596454  | 0.077932  |
| C             | 3.914337  | 1.209772  | 0.154365  |
| C             | 2.226338  | 2.951372  | 0.152230  |
| C             | 4.909886  | 2.174979  | 0.313782  |
| H             | 4.185921  | 0.154406  | 0.087836  |
| C             | 3.224955  | 3.917173  | 0.305721  |
| H             | 1.166054  | 3.211711  | 0.083903  |
| C             | 4.565727  | 3.529912  | 0.389431  |
| H             | 5.957066  | 1.872365  | 0.375260  |
| H             | 2.956617  | 4.974211  | 0.360367  |
| H             | 5.346340  | 4.283622  | 0.510725  |
| C             | 1.760276  | -0.681620 | -1.482196 |
| C             | 2.646514  | -1.758210 | -1.334415 |
| C             | 1.250454  | -0.377467 | -2.752752 |
| C             | 3.008576  | -2.527677 | -2.443768 |
| H             | 3.039338  | -2.011033 | -0.347864 |



|   |           |           |           |
|---|-----------|-----------|-----------|
| C | 1.620427  | -1.139802 | -3.861335 |
| H | 0.547868  | 0.455575  | -2.842882 |
| C | 2.497249  | -2.219695 | -3.707712 |
| H | 3.688164  | -3.373176 | -2.319449 |
| H | 1.220165  | -0.896096 | -4.847533 |
| H | 2.779441  | -2.822978 | -4.572730 |
| P | -1.615997 | 0.553108  | 0.419956  |
| C | -3.059366 | 1.526678  | -0.100411 |
| C | -2.889511 | 2.508212  | -1.085130 |
| C | -4.332949 | 1.289079  | 0.438737  |
| C | -3.986135 | 3.252917  | -1.525228 |
| H | -1.882583 | 2.664580  | -1.481264 |
| C | -5.427199 | 2.034975  | -0.003713 |
| H | -4.459963 | 0.524073  | 1.206605  |
| C | -5.255089 | 3.016623  | -0.986084 |
| H | -3.851795 | 4.019147  | -2.291466 |
| H | -6.417617 | 1.850365  | 0.417075  |
| H | -6.112663 | 3.597351  | -1.331926 |
| C | -2.033429 | -1.199561 | 0.070696  |
| C | -1.660903 | -1.706659 | -1.184761 |
| C | -2.593531 | -2.067119 | 1.020501  |
| C | -1.821889 | -3.060156 | -1.478935 |
| H | -1.208550 | -1.031607 | -1.912318 |
| C | -2.743765 | -3.426308 | 0.729221  |
| H | -2.888177 | -1.675301 | 1.994501  |
| C | -2.353989 | -3.926663 | -0.516296 |
| H | -1.517177 | -3.442766 | -2.454860 |
| H | -3.162533 | -4.098467 | 1.481236  |
| H | -2.465840 | -4.989704 | -0.738660 |
| N | -1.820811 | 0.551910  | 2.132819  |
| H | -1.747846 | 1.509983  | 2.485617  |
| H | -1.080470 | 0.000441  | 2.580033  |

## 6

E = -1935.08887155

| Atomic symbol | x         | y         | z         |
|---------------|-----------|-----------|-----------|
| C             | 0.305094  | 1.103290  | -0.601611 |
| P             | -1.130715 | 0.446068  | -0.164298 |
| C             | -2.139654 | -0.524439 | -1.391734 |
| C             | -1.448197 | -1.098291 | -2.470268 |
| C             | -3.528906 | -0.705373 | -1.294511 |
| C             | -2.138207 | -1.858455 | -3.420217 |
| H             | -0.363165 | -0.935734 | -2.568853 |
| C             | -4.217458 | -1.453519 | -2.253477 |
| H             | -4.081186 | -0.256013 | -0.467488 |
| C             | -3.521381 | -2.038281 | -3.317409 |
| H             | -1.585842 | -2.307742 | -4.249592 |
| H             | -5.299906 | -1.582400 | -2.169546 |
| H             | -4.058653 | -2.626693 | -4.065756 |
| C             | -2.277911 | 1.780967  | 0.369511  |
| C             | -3.368173 | 1.575197  | 1.227757  |
| C             | -2.019417 | 3.071291  | -0.112437 |
| C             | -4.193363 | 2.644910  | 1.592893  |
| H             | -3.554497 | 0.579550  | 1.636163  |
| C             | -2.848713 | 4.136863  | 0.241503  |
| H             | -1.134096 | 3.196762  | -0.744606 |
| C             | -3.939773 | 3.926339  | 1.095570  |
| H             | -5.032778 | 2.477341  | 2.272488  |
| H             | -2.640697 | 5.139385  | -0.140971 |

|   |           |           |           |
|---|-----------|-----------|-----------|
| H | -4.584352 | 4.761743  | 1.380157  |
| C | -1.148946 | -0.697750 | 1.282196  |
| C | -1.221754 | -2.089437 | 1.121151  |
| C | -0.878493 | -0.176207 | 2.558996  |
| C | -1.039747 | -2.939963 | 2.214561  |
| H | -1.404692 | -2.506974 | 0.129879  |
| C | -0.723196 | -1.024162 | 3.655509  |
| H | -0.779013 | 0.905293  | 2.679999  |
| C | -0.803832 | -2.412249 | 3.486306  |
| H | -1.067720 | -4.021804 | 2.067462  |
| H | -0.524788 | -0.603891 | 4.644824  |
| H | -0.659920 | -3.078982 | 4.339630  |
| P | 1.652151  | 0.236470  | -1.175209 |
| C | 3.102019  | 1.286310  | -0.694475 |
| C | 2.952815  | 2.416636  | 0.119490  |
| C | 4.379691  | 0.950532  | -1.168049 |
| C | 4.061709  | 3.200664  | 0.457249  |
| H | 1.940984  | 2.653613  | 0.463551  |
| C | 5.490960  | 1.723767  | -0.823301 |
| H | 4.475692  | 0.082562  | -1.825919 |
| C | 5.334591  | 2.852949  | -0.008424 |
| H | 3.935041  | 4.084509  | 1.089145  |
| H | 6.483670  | 1.451677  | -1.192890 |
| H | 6.202925  | 3.461580  | 0.257976  |
| C | 1.969323  | -1.262806 | -0.158457 |
| C | 2.183533  | -1.157421 | 1.224999  |
| C | 1.893365  | -2.536744 | -0.739337 |
| C | 2.327225  | -2.300628 | 2.010652  |
| H | 2.221794  | -0.166207 | 1.682140  |
| C | 2.028871  | -3.683955 | 0.049334  |
| H | 1.735633  | -2.590279 | -1.818855 |
| C | 2.250481  | -3.570363 | 1.425405  |
| H | 2.478462  | -2.204292 | 3.088283  |
| H | 1.964637  | -4.673071 | -0.413077 |
| H | 2.350800  | -4.465950 | 2.043759  |
| N | 1.810731  | -0.323352 | -2.679497 |
| H | 1.549675  | 0.413368  | -3.345062 |

7

E = -1484.13439637

| Atomic symbol | x         | y         | z         |
|---------------|-----------|-----------|-----------|
| C             | 0.305094  | 1.103290  | -0.601611 |
| P             | -1.130715 | 0.446068  | -0.164298 |
| C             | -2.139654 | -0.524439 | -1.391734 |
| C             | -1.448197 | -1.098291 | -2.470268 |
| C             | -3.528906 | -0.705373 | -1.294511 |
| C             | -2.138207 | -1.858455 | -3.420217 |
| H             | -0.363165 | -0.935734 | -2.568853 |
| C             | -4.217458 | -1.453519 | -2.253477 |
| H             | -4.081186 | -0.256013 | -0.467488 |
| C             | -3.521381 | -2.038281 | -3.317409 |
| H             | -1.585842 | -2.307742 | -4.249592 |
| H             | -5.299906 | -1.582400 | -2.169546 |
| H             | -4.058653 | -2.626693 | -4.065756 |
| C             | -2.277911 | 1.780967  | 0.369511  |
| C             | -3.368173 | 1.575197  | 1.227757  |
| C             | -2.019417 | 3.071291  | -0.112437 |
| C             | -4.193363 | 2.644910  | 1.592893  |
| H             | -3.554497 | 0.579550  | 1.636163  |

|   |           |           |           |
|---|-----------|-----------|-----------|
| C | -2.848713 | 4.136863  | 0.241503  |
| H | -1.134096 | 3.196762  | -0.744606 |
| C | -3.939773 | 3.926339  | 1.095570  |
| H | -5.032778 | 2.477341  | 2.272488  |
| H | -2.640697 | 5.139385  | -0.140971 |
| H | -4.584352 | 4.761743  | 1.380157  |
| C | -1.148946 | -0.697750 | 1.282196  |
| C | -1.221754 | -2.089437 | 1.121151  |
| C | -0.878493 | -0.176207 | 2.558996  |
| C | -1.039747 | -2.939963 | 2.214561  |
| H | -1.404692 | -2.506974 | 0.129879  |
| C | -0.723196 | -1.024162 | 3.655509  |
| H | -0.779013 | 0.905293  | 2.679999  |
| C | -0.803832 | -2.412249 | 3.486306  |
| H | -1.067720 | -4.021804 | 2.067462  |
| H | -0.524788 | -0.603891 | 4.644824  |
| H | -0.659920 | -3.078982 | 4.339630  |
| P | 1.652151  | 0.236470  | -1.175209 |
| C | 3.102019  | 1.286310  | -0.694475 |
| C | 2.952815  | 2.416636  | 0.119490  |
| C | 4.379691  | 0.950532  | -1.168049 |
| C | 4.061709  | 3.200664  | 0.457249  |
| H | 1.940984  | 2.653613  | 0.463551  |
| C | 5.490960  | 1.723767  | -0.823301 |
| H | 4.475692  | 0.082562  | -1.825919 |
| C | 5.334591  | 2.852949  | -0.008424 |
| H | 3.935041  | 4.084509  | 1.089145  |
| H | 6.483670  | 1.451677  | -1.192890 |
| H | 6.202925  | 3.461580  | 0.257976  |
| C | 1.969323  | -1.262806 | -0.158457 |
| C | 2.183533  | -1.157421 | 1.224999  |
| C | 1.893365  | -2.536744 | -0.739337 |
| C | 2.327225  | -2.300628 | 2.010652  |
| H | 2.221794  | -0.166207 | 1.682140  |
| C | 2.028871  | -3.683955 | 0.049334  |
| H | 1.735633  | -2.590279 | -1.818855 |
| C | 2.250481  | -3.570363 | 1.425405  |
| H | 2.478462  | -2.204292 | 3.088283  |
| H | 1.964637  | -4.673071 | -0.413077 |
| H | 2.350800  | -4.465950 | 2.043759  |
| N | 1.810731  | -0.323352 | -2.679497 |
| H | 1.549675  | 0.413368  | -3.345062 |

8

E = -1167.66116971

| Atomic symbol | x         | y         | z         |
|---------------|-----------|-----------|-----------|
| C             | 0.053055  | 0.034261  | 2.368759  |
| P             | -0.028062 | 0.009535  | 0.727436  |
| C             | 0.604316  | -1.466787 | -0.181383 |
| C             | -0.236636 | -2.513122 | -0.600284 |
| C             | 1.998919  | -1.662610 | -0.236533 |
| C             | 0.297938  | -3.708472 | -1.085835 |
| H             | -1.319729 | -2.383982 | -0.542833 |
| C             | 2.532265  | -2.858511 | -0.716841 |
| H             | 2.663767  | -0.872012 | 0.119049  |
| C             | 1.685449  | -3.886993 | -1.150588 |
| H             | -0.371711 | -4.506912 | -1.416890 |
| H             | 3.616455  | -2.993167 | -0.748757 |
| H             | 2.103872  | -4.823611 | -1.526266 |

|   |           |           |           |
|---|-----------|-----------|-----------|
| C | 0.799102  | 1.379363  | -0.237207 |
| C | 1.223256  | 1.280733  | -1.571214 |
| C | 1.037934  | 2.568125  | 0.466505  |
| C | 1.862506  | 2.356895  | -2.194731 |
| H | 1.068478  | 0.347667  | -2.118404 |
| C | 1.671902  | 3.646121  | -0.154686 |
| H | 0.731135  | 2.608039  | 1.516469  |
| C | 2.084002  | 3.544445  | -1.489031 |
| H | 2.193469  | 2.268394  | -3.233208 |
| H | 1.856524  | 4.566604  | 0.405110  |
| H | 2.587178  | 4.384436  | -1.974479 |
| C | -1.775463 | 0.147164  | 0.213336  |
| C | -2.155422 | 0.286159  | -1.130172 |
| C | -2.758979 | 0.114606  | 1.210165  |
| C | -3.509349 | 0.374004  | -1.473878 |
| H | -1.391802 | 0.324856  | -1.909587 |
| C | -4.109394 | 0.206679  | 0.867458  |
| H | -2.404424 | 0.019575  | 2.242734  |
| C | -4.488663 | 0.332535  | -0.477306 |
| H | -3.799297 | 0.479821  | -2.522389 |
| H | -4.872867 | 0.180440  | 1.649275  |
| H | -5.545821 | 0.403274  | -0.745919 |
| C | 1.210928  | -0.056625 | 3.103789  |
| N | 2.162818  | -0.122037 | 3.816087  |

9

E = -2111.41451385

| Atomic symbol | x         | y         | z         |
|---------------|-----------|-----------|-----------|
| C             | -0.000000 | 0.000000  | 1.220459  |
| P             | 1.452168  | -0.059236 | 0.418484  |
| P             | -1.452168 | 0.059236  | 0.418484  |
| C             | 1.765252  | -1.564411 | -0.585934 |
| C             | 2.820514  | -0.032786 | 1.623703  |
| C             | -1.765252 | 1.564409  | -0.585937 |
| C             | 1.826090  | 1.347365  | -0.699085 |
| C             | -2.820515 | 0.032790  | 1.623701  |
| C             | -1.826090 | -1.347367 | -0.699082 |
| C             | 1.126453  | -2.740302 | -0.162270 |
| C             | 1.271864  | -3.921392 | -0.887611 |
| C             | 2.054999  | -3.940349 | -2.046671 |
| C             | 2.703281  | -2.776266 | -2.468288 |
| C             | 2.516376  | 0.153034  | 2.976645  |
| C             | 3.542853  | 0.189704  | 3.924194  |
| C             | 2.563875  | -1.591931 | -1.738415 |
| C             | 4.873326  | 0.038573  | 3.520876  |
| C             | 5.178398  | -0.152218 | 2.168161  |
| C             | 4.154196  | -0.189162 | 1.220461  |
| C             | -1.126453 | 2.740301  | -0.162276 |
| C             | -1.271864 | 3.921390  | -0.887619 |
| C             | -2.054999 | 3.940345  | -2.046679 |
| C             | -2.703282 | 2.776261  | -2.468293 |
| C             | -2.563876 | 1.591927  | -1.738418 |
| C             | 1.325821  | 1.376372  | -2.011314 |
| C             | 1.403921  | 2.538285  | -2.778568 |
| C             | 1.985857  | 3.691784  | -2.244689 |
| C             | 2.491039  | 3.673237  | -0.940992 |
| C             | 2.410228  | 2.510330  | -0.172150 |
| C             | -2.516378 | -0.153029 | 2.976644  |
| C             | -3.542855 | -0.189696 | 3.924192  |

|   |           |           |           |
|---|-----------|-----------|-----------|
| C | -4.873328 | -0.038563 | 3.520874  |
| C | -5.178399 | 0.152226  | 2.168159  |
| C | -4.154196 | 0.189167  | 1.220459  |
| C | -2.410227 | -2.510331 | -0.172146 |
| C | -2.491036 | -3.673240 | -0.940985 |
| C | -1.985854 | -3.691790 | -2.244681 |
| C | -1.403918 | -2.538291 | -2.778563 |
| C | -1.325820 | -1.376377 | -2.011312 |
| H | -0.868869 | -0.481108 | -2.433072 |
| H | -0.998813 | -2.546559 | -3.791960 |
| H | -2.041528 | -4.603760 | -2.841716 |
| H | -2.949196 | -4.570058 | -0.518963 |
| H | -2.794750 | -2.503609 | 0.849620  |
| H | -0.493735 | 2.699159  | 0.726530  |
| H | -0.758251 | 4.826001  | -0.558008 |
| H | -2.157974 | 4.861980  | -2.622798 |
| H | -3.317920 | 2.787864  | -3.370821 |
| H | -3.066142 | 0.684180  | -2.076983 |
| H | -1.463879 | -0.264276 | 3.251144  |
| H | -3.304814 | -0.335233 | 4.979860  |
| H | -5.675460 | -0.065552 | 4.261149  |
| H | -6.216474 | 0.275574  | 1.853462  |
| H | -4.391782 | 0.342476  | 0.165640  |
| H | 3.066142  | -0.684184 | -2.076982 |
| H | 3.317919  | -2.787870 | -3.370816 |
| H | 2.157974  | -4.861985 | -2.622789 |
| H | 0.758251  | -4.826003 | -0.557999 |
| H | 0.493735  | -2.699158 | 0.726536  |
| H | 3.304811  | 0.335242  | 4.979861  |
| H | 1.463877  | 0.264280  | 3.251144  |
| H | 4.391783  | -0.342472 | 0.165642  |
| H | 6.216473  | -0.275564 | 1.853465  |
| H | 5.675458  | 0.065564  | 4.261152  |
| H | 0.868871  | 0.481103  | -2.433074 |
| H | 2.794750  | 2.503610  | 0.849616  |
| H | 2.949199  | 4.570055  | -0.518972 |
| H | 2.041533  | 4.603753  | -2.841726 |
| H | 0.998816  | 2.546551  | -3.791966 |

## 1.2 BP86-D3(BJ)/Def2TZVP, linear structures

**1**

E = -1871.85498610

| Atomic symbol | x         | y         | z         |
|---------------|-----------|-----------|-----------|
| C             | 0.292898  | -0.133312 | 1.322714  |
| P             | -0.762347 | -0.008899 | 0.098787  |
| C             | -1.810533 | -1.492570 | -0.123516 |
| C             | -1.571612 | -2.564647 | 0.747276  |
| C             | -2.796856 | -1.601693 | -1.115179 |
| C             | -2.318545 | -3.739630 | 0.626550  |
| H             | -0.795762 | -2.455791 | 1.510951  |
| C             | -3.535072 | -2.780117 | -1.237339 |
| H             | -2.990827 | -0.771212 | -1.795571 |
| C             | -3.297226 | -3.849087 | -0.365591 |
| H             | -2.134582 | -4.570590 | 1.310062  |
| H             | -4.300056 | -2.865036 | -2.011602 |
| H             | -3.879191 | -4.767910 | -0.460521 |

|   |           |           |           |
|---|-----------|-----------|-----------|
| C | 0.166029  | 0.189989  | -1.454985 |
| C | 0.622490  | 1.462798  | -1.837383 |
| C | 0.584201  | -0.941549 | -2.173885 |
| C | 1.464149  | 1.601974  | -2.942358 |
| H | 0.305751  | 2.340368  | -1.271277 |
| C | 1.429618  | -0.798368 | -3.276045 |
| H | 0.235047  | -1.930176 | -1.870644 |
| C | 1.870867  | 0.472555  | -3.662686 |
| H | 1.798752  | 2.595776  | -3.247101 |
| H | 1.736649  | -1.680310 | -3.841931 |
| H | 2.513555  | 0.584980  | -4.538676 |
| C | -1.896214 | 1.421234  | 0.185434  |
| C | -2.625601 | 1.890697  | -0.917620 |
| C | -2.004339 | 2.070378  | 1.422764  |
| C | -3.470123 | 2.993963  | -0.777029 |
| H | -2.514845 | 1.414937  | -1.894102 |
| C | -2.857916 | 3.167032  | 1.561887  |
| H | -1.394871 | 1.714652  | 2.258162  |
| C | -3.592285 | 3.627622  | 0.464345  |
| H | -4.030397 | 3.363637  | -1.638055 |
| H | -2.942114 | 3.668956  | 2.527466  |
| H | -4.253529 | 4.489517  | 0.572390  |
| S | 1.344576  | -0.257305 | 2.542505  |
| O | 1.458964  | -1.585508 | 3.157054  |
| O | 1.423974  | 0.891419  | 3.450962  |
| C | 2.540662  | -0.089878 | 1.249462  |
| C | 2.978961  | 1.197198  | 0.822514  |
| C | 2.989555  | -1.233023 | 0.525215  |
| C | 3.689734  | 1.315330  | -0.338325 |
| H | 2.709442  | 2.074663  | 1.408495  |
| C | 3.697845  | -1.062789 | -0.630111 |
| H | 2.728691  | -2.227802 | 0.883093  |
| H | 4.025082  | 2.267660  | -0.744915 |
| H | 4.038072  | -1.886095 | -1.255436 |
| H | 4.484420  | 0.310124  | -1.960150 |
| N | 4.030725  | 0.198297  | -1.060472 |

2

E = -1855.29050029

| Atomic symbol | x         | y         | z         |
|---------------|-----------|-----------|-----------|
| C             | -0.463717 | 1.123064  | -0.107086 |
| P             | 0.770190  | 0.128952  | 0.001655  |
| C             | 2.104724  | 0.397996  | -1.252815 |
| C             | 1.721685  | 1.122479  | -2.390842 |
| C             | 3.434988  | -0.025754 | -1.120705 |
| C             | 2.650416  | 1.389991  | -3.398729 |
| H             | 0.690432  | 1.488873  | -2.439292 |
| C             | 4.366898  | 0.248518  | -2.128029 |
| H             | 3.753312  | -0.550561 | -0.217366 |
| C             | 3.973964  | 0.949750  | -3.272047 |
| H             | 2.344575  | 1.956181  | -4.281816 |
| H             | 5.403661  | -0.079225 | -2.015615 |
| H             | 4.702412  | 1.167236  | -4.057100 |
| C             | 0.324806  | -1.650985 | -0.202601 |
| C             | -0.992783 | -1.994209 | 0.140378  |
| C             | 1.173379  | -2.635858 | -0.730169 |
| C             | -1.448511 | -3.301957 | -0.024450 |
| H             | -1.655804 | -1.208044 | 0.508084  |
| C             | 0.714285  | -3.947462 | -0.899705 |

|   |           |           |           |
|---|-----------|-----------|-----------|
| H | 2.188318  | -2.373764 | -1.036310 |
| C | -0.594691 | -4.284429 | -0.543106 |
| H | -2.480548 | -3.546404 | 0.237145  |
| H | 1.379671  | -4.705864 | -1.320605 |
| H | -0.953818 | -5.307094 | -0.682306 |
| C | 1.696343  | 0.157827  | 1.604234  |
| C | 2.454842  | -0.908832 | 2.109101  |
| C | 1.543941  | 1.319886  | 2.374676  |
| C | 3.075161  | -0.805084 | 3.359158  |
| H | 2.538876  | -1.835989 | 1.537383  |
| C | 2.174290  | 1.428172  | 3.615652  |
| H | 0.894254  | 2.110627  | 1.984959  |
| C | 2.943987  | 0.367015  | 4.110064  |
| H | 3.656185  | -1.644115 | 3.750920  |
| H | 2.052907  | 2.338011  | 4.208522  |
| H | 3.426333  | 0.447425  | 5.087315  |
| S | -1.712834 | 2.129431  | -0.217168 |
| O | -1.848672 | 2.784757  | -1.537630 |
| O | -1.879600 | 3.031076  | 0.944680  |
| C | -3.092166 | 0.959303  | -0.117820 |
| C | -3.675820 | 0.662776  | 1.120620  |
| C | -3.477433 | 0.242822  | -1.259478 |
| C | -4.612730 | -0.369459 | 1.221469  |
| H | -3.364651 | 1.242706  | 1.991211  |
| C | -4.415156 | -0.785739 | -1.154924 |
| H | -3.013843 | 0.496176  | -2.214233 |
| H | -5.057976 | -0.605214 | 2.192033  |
| H | -4.702168 | -1.350902 | -2.045702 |
| H | -5.711553 | -1.912934 | 0.168143  |
| C | -4.982688 | -1.102991 | 0.086835  |

## 3

E = -1379.69582999

| Atomic symbol | x         | y         | z         |
|---------------|-----------|-----------|-----------|
| C             | -1.320377 | 0.104922  | -0.000001 |
| P             | 0.277932  | -0.021473 | 0.000000  |
| C             | 0.960228  | -0.910882 | -1.462672 |
| C             | 0.050501  | -1.544978 | -2.316400 |
| C             | 2.332409  | -0.984753 | -1.743783 |
| C             | 0.501680  | -2.254688 | -3.431678 |
| H             | -1.014491 | -1.454782 | -2.087153 |
| C             | 2.786046  | -1.696276 | -2.856965 |
| H             | 3.051420  | -0.469388 | -1.105176 |
| C             | 1.871681  | -2.335276 | -3.700985 |
| H             | -0.215878 | -2.742934 | -4.094472 |
| H             | 3.855823  | -1.749244 | -3.069339 |
| H             | 2.227590  | -2.889771 | -4.571554 |
| C             | 0.960227  | -0.910882 | 1.462673  |
| C             | 2.332407  | -0.984750 | 1.743788  |
| C             | 0.050499  | -1.544982 | 2.316398  |
| C             | 2.786043  | -1.696273 | 2.856970  |
| H             | 3.051418  | -0.469381 | 1.105184  |
| C             | 0.501678  | -2.254692 | 3.431676  |
| H             | -1.014493 | -1.454788 | 2.087149  |
| C             | 1.871677  | -2.335276 | 3.700986  |
| H             | 3.855820  | -1.749238 | 3.069347  |
| H             | -0.215881 | -2.742941 | 4.094468  |
| H             | 2.227586  | -2.889772 | 4.571556  |
| C             | 1.235478  | 1.553975  | 0.000001  |

|   |           |           |           |
|---|-----------|-----------|-----------|
| C | 1.515153  | 2.209720  | -1.209595 |
| C | 1.515148  | 2.209722  | 1.209598  |
| C | 2.073360  | 3.489886  | -1.209903 |
| H | 1.293218  | 1.711587  | -2.155940 |
| C | 2.073355  | 3.489887  | 1.209906  |
| H | 1.293208  | 1.711590  | 2.155942  |
| C | 2.355437  | 4.133278  | 0.000002  |
| H | 2.291876  | 3.986922  | -2.157507 |
| H | 2.291866  | 3.986925  | 2.157510  |
| H | 2.794195  | 5.132920  | 0.000002  |
| C | -4.914362 | -0.238243 | -0.000005 |
| C | -4.770654 | 1.116311  | -0.000001 |
| H | -5.811219 | -0.846222 | -0.000008 |
| H | -5.519551 | 1.899508  | 0.000001  |
| C | -2.657696 | 0.210678  | -0.000002 |
| N | -3.410285 | 1.391686  | 0.000001  |
| N | -3.640728 | -0.797293 | -0.000006 |
| C | -3.319292 | -2.204097 | -0.000010 |
| H | -2.221472 | -2.275025 | -0.000010 |
| H | -3.715463 | -2.706097 | 0.896785  |
| H | -3.715462 | -2.706091 | -0.896809 |
| C | -2.763367 | 2.683489  | 0.000006  |
| H | -2.118949 | 2.786125  | 0.887048  |
| H | -2.118949 | 2.786131  | -0.887036 |
| H | -3.527658 | 3.470391  | 0.000008  |

## 4

E = -1339.80438124

| Atomic symbol | x         | y         | z         |
|---------------|-----------|-----------|-----------|
| C             | -1.410925 | -0.452568 | 0.010884  |
| P             | 0.134821  | -0.115953 | 0.010677  |
| C             | 1.254549  | -1.446314 | -0.652173 |
| C             | 0.635374  | -2.675394 | -0.913404 |
| C             | 2.628491  | -1.304289 | -0.898140 |
| C             | 1.376635  | -3.749046 | -1.413808 |
| H             | -0.440420 | -2.746677 | -0.711702 |
| C             | 3.371461  | -2.374524 | -1.409433 |
| H             | 3.119902  | -0.347689 | -0.707288 |
| C             | 2.747354  | -3.599878 | -1.665807 |
| H             | 0.885313  | -4.705130 | -1.612679 |
| H             | 4.440258  | -2.253585 | -1.607260 |
| H             | 3.327974  | -4.436829 | -2.062565 |
| C             | 0.869929  | 0.231272  | 1.687202  |
| C             | 2.126131  | 0.815035  | 1.904081  |
| C             | 0.079671  | -0.118114 | 2.788783  |
| C             | 2.582299  | 1.053389  | 3.205595  |
| H             | 2.742968  | 1.107632  | 1.051283  |
| C             | 0.537061  | 0.104224  | 4.089855  |
| H             | -0.901489 | -0.558490 | 2.579414  |
| C             | 1.790421  | 0.694477  | 4.301222  |
| H             | 3.557786  | 1.520915  | 3.366399  |
| H             | -0.085096 | -0.176995 | 4.943719  |
| H             | 2.147327  | 0.878114  | 5.317954  |
| C             | 0.687981  | 1.368901  | -0.951526 |
| C             | 0.997997  | 1.266921  | -2.319015 |
| C             | 0.538300  | 2.653241  | -0.394246 |
| C             | 1.160002  | 2.410264  | -3.105325 |
| H             | 1.102429  | 0.275821  | -2.767200 |
| C             | 0.696284  | 3.798338  | -1.178555 |



|   |           |           |           |
|---|-----------|-----------|-----------|
| H | 0.288095  | 2.745991  | 0.665722  |
| C | 1.009248  | 3.683561  | -2.539122 |
| H | 1.403598  | 2.310035  | -4.166584 |
| H | 0.577307  | 4.787340  | -0.727305 |
| H | 1.130982  | 4.578436  | -3.154115 |
| C | -4.737522 | -1.704690 | 0.102413  |
| C | -5.000684 | -0.368264 | -0.119330 |
| H | -5.464275 | -2.509593 | 0.211440  |
| H | -5.924027 | 0.191080  | -0.242719 |
| C | -2.765982 | -0.747657 | 0.011064  |
| N | -3.755498 | 0.242419  | -0.174117 |
| N | -3.387338 | -1.949533 | 0.179608  |
| C | -3.473145 | 1.634944  | -0.405626 |
| H | -2.399535 | 1.774930  | -0.199361 |
| H | -3.668057 | 1.931196  | -1.451936 |
| H | -4.069080 | 2.279603  | 0.262665  |

## 5

E = -1935.64868389

| Atomicymbol | X          | Y          | Z          |
|-------------|------------|------------|------------|
| C           | 0.2708120  | -0.0140240 | -0.5515620 |
| P           | -1.2825160 | 0.0312690  | -0.1219210 |
| C           | -2.4691250 | -0.3623450 | -1.4642790 |
| C           | -2.0104080 | -1.1617510 | -2.5194970 |
| C           | -3.7939170 | 0.0969800  | -1.4685630 |
| C           | -2.8701780 | -1.5121650 | -3.5620920 |
| H           | -0.9669590 | -1.4872980 | -2.5039630 |
| C           | -4.6526610 | -0.2499240 | -2.5154050 |
| H           | -4.1516690 | 0.7360240  | -0.6591020 |
| C           | -4.1935020 | -1.0573540 | -3.5605640 |
| H           | -2.5083390 | -2.1377400 | -4.3807160 |
| H           | -5.6814370 | 0.1157540  | -2.5179740 |
| H           | -4.8651550 | -1.3259800 | -4.3782600 |
| C           | -1.8558090 | 1.6522240  | 0.5221830  |
| C           | -2.8489480 | 1.7729580  | 1.5049000  |
| C           | -1.2389420 | 2.8050670  | 0.0160450  |
| C           | -3.2267860 | 3.0366650  | 1.9689280  |
| H           | -3.3147680 | 0.8766860  | 1.9198650  |
| C           | -1.6199020 | 4.0659590  | 0.4767250  |
| H           | -0.4434900 | 2.6887760  | -0.7241780 |
| C           | -2.6153260 | 4.1834770  | 1.4538650  |
| H           | -3.9946440 | 3.1252470  | 2.7401720  |
| H           | -1.1337450 | 4.9595340  | 0.0801860  |
| H           | -2.9076080 | 5.1693400  | 1.8207610  |
| C           | -1.7253720 | -1.1315780 | 1.2284830  |
| C           | -2.7766980 | -2.0535080 | 1.1402840  |
| C           | -0.9073370 | -1.1270040 | 2.3712750  |
| C           | -3.0059570 | -2.9610280 | 2.1805560  |
| H           | -3.4125680 | -2.0688470 | 0.2536730  |
| C           | -1.1422480 | -2.0262490 | 3.4104550  |
| H           | -0.0726480 | -0.4241300 | 2.4242630  |
| C           | -2.1928540 | -2.9478370 | 3.3161060  |
| H           | -3.8222430 | -3.6817880 | 2.1003130  |
| H           | -0.5020600 | -2.0141890 | 4.2947810  |
| H           | -2.3728410 | -3.6567070 | 4.1265710  |
| P           | 1.8226930  | -0.0592740 | -0.9808030 |
| C           | 2.7665640  | 1.3994660  | -0.4034290 |
| C           | 2.2573490  | 2.1079410  | 0.6950630  |
| C           | 3.9596050  | 1.8281170  | -1.0057740 |

|   |           |            |            |
|---|-----------|------------|------------|
| C | 2.9323900 | 3.2242250  | 1.1903430  |
| H | 1.3146610 | 1.7744210  | 1.1345270  |
| C | 4.6320580 | 2.9499110  | -0.5121930 |
| H | 4.3449960 | 1.2895000  | -1.8726120 |
| C | 4.1225480 | 3.6468500  | 0.5875210  |
| H | 2.5262050 | 3.7700800  | 2.0442570  |
| H | 5.5557900 | 3.2830460  | -0.9899620 |
| H | 4.6496620 | 4.5226460  | 0.9713060  |
| C | 2.7178320 | -1.5282650 | -0.3531950 |
| C | 2.0073320 | -2.4233170 | 0.4572190  |
| C | 4.0728480 | -1.7682900 | -0.6289820 |
| C | 2.6418170 | -3.5484690 | 0.9879510  |
| H | 0.9528700 | -2.2166010 | 0.6550780  |
| C | 4.7065510 | -2.8939270 | -0.0973200 |
| H | 4.6295400 | -1.0745870 | -1.2606800 |
| C | 3.9926050 | -3.7843700 | 0.7122370  |
| H | 2.0806590 | -4.2414700 | 1.6180300  |
| H | 5.7609430 | -3.0775660 | -0.3138900 |
| H | 4.4910270 | -4.6625140 | 1.1278250  |
| N | 2.3146560 | -0.1086720 | -2.6303950 |
| H | 1.8621850 | 0.6360110  | -3.1675410 |
| H | 2.0703370 | -1.0074640 | -3.0528200 |

## 6

E = -1935.07583925

| Atomic symbol | x         | y         | z         |
|---------------|-----------|-----------|-----------|
| C             | 0.221822  | -0.040463 | -0.707213 |
| P             | -1.266290 | 0.009679  | -0.145352 |
| C             | -2.557217 | -0.670642 | -1.289015 |
| C             | -2.087234 | -1.128979 | -2.526065 |
| C             | -3.925705 | -0.752604 | -0.996743 |
| C             | -2.976369 | -1.663807 | -3.462503 |
| H             | -1.009020 | -1.055221 | -2.713955 |
| C             | -4.816375 | -1.290254 | -1.931293 |
| H             | -4.300366 | -0.405252 | -0.031692 |
| C             | -4.342250 | -1.745823 | -3.166622 |
| H             | -2.602564 | -2.021657 | -4.425026 |
| H             | -5.882061 | -1.355372 | -1.696547 |
| H             | -5.038204 | -2.165955 | -3.897134 |
| C             | -1.920200 | 1.689617  | 0.290166  |
| C             | -3.030926 | 1.925463  | 1.114106  |
| C             | -1.201909 | 2.780197  | -0.216620 |
| C             | -3.419362 | 3.233359  | 1.421995  |
| H             | -3.579292 | 1.083329  | 1.542179  |
| C             | -1.592547 | 4.087330  | 0.081150  |
| H             | -0.319177 | 2.563229  | -0.826462 |
| C             | -2.703497 | 4.317035  | 0.902171  |
| H             | -4.279387 | 3.408167  | 2.073805  |
| H             | -1.021137 | 4.929465  | -0.316400 |
| H             | -3.004872 | 5.338836  | 1.145690  |
| C             | -1.545623 | -0.941767 | 1.407971  |
| C             | -1.859027 | -2.310144 | 1.353218  |
| C             | -1.178753 | -0.382505 | 2.644858  |
| C             | -1.808645 | -3.099116 | 2.504897  |
| H             | -2.125492 | -2.757924 | 0.393333  |
| C             | -1.130164 | -1.169282 | 3.797008  |
| H             | -0.915614 | 0.676735  | 2.694679  |
| C             | -1.444705 | -2.532710 | 3.731841  |
| H             | -2.047501 | -4.163821 | 2.444052  |

|   |           |           |           |
|---|-----------|-----------|-----------|
| H | -0.839786 | -0.719897 | 4.749990  |
| H | -1.398670 | -3.150999 | 4.631180  |
| P | 1.778242  | -0.092907 | -1.294863 |
| C | 2.641668  | 1.384930  | -0.542976 |
| C | 2.203480  | 1.967022  | 0.655024  |
| C | 3.730916  | 1.958181  | -1.214230 |
| C | 2.837644  | 3.098845  | 1.173776  |
| H | 1.336959  | 1.522905  | 1.152554  |
| C | 4.366652  | 3.094914  | -0.702949 |
| H | 4.045441  | 1.498323  | -2.155951 |
| C | 3.922234  | 3.667984  | 0.493996  |
| H | 2.480793  | 3.546997  | 2.105333  |
| H | 5.209703  | 3.539452  | -1.239924 |
| H | 4.414670  | 4.558667  | 0.893293  |
| C | 2.670757  | -1.463915 | -0.452715 |
| C | 2.214712  | -1.925985 | 0.789206  |
| C | 3.794406  | -2.063463 | -1.038457 |
| C | 2.878422  | -2.965637 | 1.446453  |
| H | 1.315658  | -1.471434 | 1.213798  |
| C | 4.457366  | -3.106796 | -0.384274 |
| H | 4.110486  | -1.708355 | -2.021631 |
| C | 4.004456  | -3.557089 | 0.861840  |
| H | 2.509036  | -3.321769 | 2.411651  |
| H | 5.328613  | -3.576679 | -0.849446 |
| H | 4.522874  | -4.373723 | 1.371572  |
| N | 2.188615  | -0.274059 | -2.835969 |
| H | 1.665163  | 0.385420  | -3.421938 |

7

E = -1484.12920448

| Atomic symbol | x         | y         | z         |
|---------------|-----------|-----------|-----------|
| C             | 1.578260  | 0.043297  | 0.141201  |
| P             | -0.010213 | -0.000800 | 0.014651  |
| C             | -1.007383 | 0.162934  | 1.568707  |
| C             | -1.181948 | 1.432720  | 2.147278  |
| C             | -1.410403 | -0.966090 | 2.301013  |
| C             | -1.752031 | 1.571149  | 3.414030  |
| H             | -0.853806 | 2.316020  | 1.593606  |
| C             | -1.977737 | -0.831908 | 3.571302  |
| H             | -1.270142 | -1.959182 | 1.867694  |
| C             | -2.154231 | 0.437931  | 4.133740  |
| H             | -1.883248 | 2.567147  | 3.845889  |
| H             | -2.285170 | -1.722614 | 4.126255  |
| H             | -2.596815 | 0.544378  | 5.127142  |
| C             | -0.737054 | -1.555235 | -0.727108 |
| C             | -2.102424 | -1.797659 | -0.935528 |
| C             | 0.192367  | -2.527584 | -1.113289 |
| C             | -2.530904 | -2.996997 | -1.516186 |
| H             | -2.840972 | -1.052396 | -0.633786 |
| C             | -0.229132 | -3.726999 | -1.693481 |
| H             | 1.248661  | -2.294128 | -0.934358 |
| C             | -1.594731 | -3.964514 | -1.896742 |
| H             | -3.598024 | -3.177906 | -1.673112 |
| H             | 0.506514  | -4.480487 | -1.988196 |
| H             | -1.929244 | -4.900855 | -2.351159 |
| C             | -0.796902 | 1.319410  | -1.048669 |
| C             | -2.151549 | 1.681804  | -1.024338 |
| C             | 0.071868  | 2.000580  | -1.909821 |
| C             | -2.629534 | 2.705764  | -1.850660 |

|    |           |           |           |
|----|-----------|-----------|-----------|
| H  | -2.834855 | 1.181945  | -0.333796 |
| C  | -0.401887 | 3.012869  | -2.747227 |
| H  | 1.128963  | 1.712666  | -1.873626 |
| C  | -1.757036 | 3.369329  | -2.719124 |
| H  | -3.685245 | 2.989233  | -1.814774 |
| H  | 0.286271  | 3.534998  | -3.417731 |
| H  | -2.129767 | 4.168465  | -3.365252 |
| Si | 3.320332  | 0.091659  | 0.279989  |
| C  | 4.140356  | 1.444662  | -0.800840 |
| H  | 3.746206  | 2.437230  | -0.529609 |
| H  | 5.238672  | 1.467203  | -0.688537 |
| H  | 3.910058  | 1.275422  | -1.865459 |
| C  | 3.952641  | 0.427063  | 2.053692  |
| H  | 3.569628  | 1.394808  | 2.414855  |
| H  | 3.581416  | -0.350101 | 2.740595  |
| H  | 5.054954  | 0.445839  | 2.114259  |
| C  | 4.186230  | -1.533830 | -0.250371 |
| H  | 3.946429  | -1.770904 | -1.299795 |
| H  | 5.284973  | -1.476880 | -0.155815 |
| H  | 3.832085  | -2.373295 | 0.369625  |

8

E = -1167.65583845

| Atomic symbol | x         | y         | z         |
|---------------|-----------|-----------|-----------|
| C             | 0.088821  | -0.260559 | 2.261730  |
| P             | 0.023834  | -0.062600 | 0.688283  |
| C             | -0.261408 | 1.648040  | 0.041959  |
| C             | 0.811872  | 2.488228  | -0.298073 |
| C             | -1.555811 | 2.196169  | 0.089199  |
| C             | 0.597711  | 3.837243  | -0.593102 |
| H             | 1.823292  | 2.076500  | -0.326462 |
| C             | -1.772778 | 3.542300  | -0.208759 |
| H             | -2.393982 | 1.554776  | 0.372508  |
| C             | -0.696060 | 4.370500  | -0.553125 |
| H             | 1.444445  | 4.476838  | -0.856248 |
| H             | -2.786022 | 3.951039  | -0.171190 |
| H             | -0.864304 | 5.425520  | -0.781815 |
| C             | -1.313032 | -1.015237 | -0.187838 |
| C             | -1.785607 | -0.725282 | -1.476636 |
| C             | -1.881041 | -2.080104 | 0.522753  |
| C             | -2.808488 | -1.491675 | -2.046464 |
| H             | -1.372531 | 0.122402  | -2.028123 |
| C             | -2.892323 | -2.855755 | -0.047827 |
| H             | -1.513353 | -2.258441 | 1.538858  |
| C             | -3.359633 | -2.562651 | -1.336236 |
| H             | -3.179032 | -1.250497 | -3.046565 |
| H             | -3.326389 | -3.686320 | 0.514811  |
| H             | -4.157994 | -3.161915 | -1.781205 |
| C             | 1.554199  | -0.575741 | -0.237741 |
| C             | 1.692352  | -0.543766 | -1.633396 |
| C             | 2.614785  | -1.049756 | 0.543170  |
| C             | 2.879326  | -0.972173 | -2.237709 |
| H             | 0.874047  | -0.174555 | -2.254390 |
| C             | 3.802545  | -1.476870 | -0.056478 |
| H             | 2.465485  | -1.068299 | 1.628271  |
| C             | 3.937262  | -1.438729 | -1.450341 |
| H             | 2.979691  | -0.942840 | -3.326117 |
| H             | 4.626276  | -1.841444 | 0.562676  |
| H             | 4.864097  | -1.774209 | -1.922596 |

|   |          |           |          |
|---|----------|-----------|----------|
| C | 0.143827 | -0.428115 | 3.593528 |
| N | 0.197093 | -0.592281 | 4.774523 |

9

E = -2111.40225977

| Atomic symbols | X          | Y          | Z          |
|----------------|------------|------------|------------|
| C              | -0.0006780 | 0.0001090  | 0.0000170  |
| P              | 1.6088950  | 0.0001640  | 0.0003330  |
| P              | -1.6102470 | 0.0000540  | -0.0002990 |
| C              | 2.3670390  | 1.5258430  | -0.6821590 |
| C              | 2.3679470  | -1.3532420 | -0.9796480 |
| C              | -2.3689360 | -0.2982210 | 1.6441010  |
| C              | 2.3679000  | -0.1719700 | 1.6624010  |
| C              | -2.3680270 | -1.2754890 | -1.0804880 |
| C              | -2.3683060 | 1.5734620  | -0.5643780 |
| C              | 1.6575080  | 2.1971710  | -1.6890630 |
| C              | 2.1654650  | 3.3730220  | -2.2423660 |
| C              | 3.3834770  | 3.8923920  | -1.7879790 |
| C              | 4.0892810  | 3.2327860  | -0.7777900 |
| C              | 1.6587220  | -2.5610770 | -1.0578810 |
| C              | 2.1674620  | -3.6282440 | -1.7988190 |
| C              | 3.5838720  | 2.0515760  | -0.2254070 |
| C              | 3.3859140  | -3.4943370 | -2.4750380 |
| C              | 4.0912700  | -2.2894520 | -2.4088460 |
| C              | 3.5851130  | -1.2204420 | -1.6625250 |
| C              | -1.6633660 | -1.1215510 | 2.5343290  |
| C              | -2.1721570 | -1.3785940 | 3.8077710  |
| C              | -3.3869060 | -0.8077120 | 4.2055610  |
| C              | -4.0884980 | 0.0218880  | 3.3262220  |
| C              | -3.5823150 | 0.2766380  | 2.0476060  |
| C              | 1.6560790  | 0.3583400  | 2.7487550  |
| C              | 2.1659590  | 0.2505040  | 4.0430540  |
| C              | 3.3878570  | -0.3961790 | 4.2633920  |
| C              | 4.0955070  | -0.9360350 | 3.1856920  |
| C              | 3.5882830  | -0.8245990 | 1.8872030  |
| C              | -1.6569410 | -1.6416240 | -2.2329900 |
| C              | -2.1644660 | -2.6169370 | -3.0920120 |
| C              | -3.3833910 | -3.2411070 | -2.8015790 |
| C              | -4.0903280 | -2.8878230 | -1.6486720 |
| C              | -3.5854330 | -1.9068170 | -0.7891980 |
| C              | -3.5826820 | 1.6365780  | -1.2622980 |
| C              | -4.0874870 | 2.8716410  | -1.6814440 |
| C              | -3.3838650 | 4.0471820  | -1.4045810 |
| C              | -2.1683110 | 3.9871010  | -0.7127710 |
| C              | -1.6606750 | 2.7553340  | -0.2984420 |
| H              | -0.6992200 | 2.6844740  | 0.2157450  |
| H              | -1.6111150 | 4.9024320  | -0.5034900 |
| H              | -3.7776690 | 5.0100980  | -1.7357970 |
| H              | -5.0293550 | 2.9144320  | -2.2322120 |
| H              | -4.1261350 | 0.7183910  | -1.4938390 |
| H              | -0.7025590 | -1.5330900 | 2.2160460  |
| H              | -1.6164940 | -2.0190720 | 4.4956110  |
| H              | -3.7816640 | -1.0025550 | 5.2046550  |
| H              | -5.0298880 | 0.4786760  | 3.6383420  |
| H              | -4.1238310 | 0.9375490  | 1.3680520  |
| H              | -0.6929870 | -1.1649740 | -2.4256700 |
| H              | -1.6044960 | -2.8977480 | -3.9862750 |
| H              | -3.7771480 | -4.0097450 | -3.4695180 |
| H              | -5.0348270 | -3.3823590 | -1.4127850 |

|   |            |            |            |
|---|------------|------------|------------|
| H | -4.1308220 | -1.6443670 | 0.1194070  |
| H | 4.1288520  | 1.5469430  | 0.5747800  |
| H | 5.0332790  | 3.6424090  | -0.4125930 |
| H | 3.7776250  | 4.8164510  | -2.2154810 |
| H | 1.6065570  | 3.8909740  | -3.0243170 |
| H | 0.6945930  | 1.7916390  | -2.0086830 |
| H | 1.6089540  | -4.5646600 | -1.8563470 |
| H | 0.6954240  | -2.6353270 | -0.5479650 |
| H | 4.1296340  | -0.2749370 | -1.6251670 |
| H | 5.0355720  | -2.1778420 | -2.9456240 |
| H | 3.7807030  | -4.3267160 | -3.0609330 |
| H | 0.6899280  | 0.8321100  | 2.5591520  |
| H | 4.1347720  | -1.2613670 | 1.0489960  |
| H | 5.0423290  | -1.4524840 | 3.3562740  |
| H | 3.7834290  | -0.4873790 | 5.2769010  |
| H | 1.6054890  | 0.6640780  | 4.8838530  |

### 1.3 BP86-D3(BJ)/Def2TZVP, 150° structures

**1**

E = -1871.86129184

| Atomic symbol | x         | y         | z         |
|---------------|-----------|-----------|-----------|
| C             | -0.207947 | -0.383098 | -1.492472 |
| P             | 0.750940  | -0.027932 | -0.211013 |
| C             | 1.453993  | -1.410383 | 0.764776  |
| C             | 0.917482  | -2.685292 | 0.528485  |
| C             | 2.468411  | -1.242807 | 1.720928  |
| C             | 1.385855  | -3.780789 | 1.260920  |
| H             | 0.151552  | -2.814646 | -0.243321 |
| C             | 2.929359  | -2.340213 | 2.449745  |
| H             | 2.903821  | -0.257213 | 1.893697  |
| C             | 2.385689  | -3.610082 | 2.222183  |
| H             | 0.971265  | -4.772517 | 1.070267  |
| H             | 3.718926  | -2.207475 | 3.192081  |
| H             | 2.751747  | -4.468104 | 2.789548  |
| C             | -0.145410 | 0.995074  | 1.005356  |
| C             | -0.569740 | 2.276119  | 0.607087  |
| C             | -0.521212 | 0.503377  | 2.264247  |
| C             | -1.333677 | 3.061386  | 1.470030  |
| H             | -0.288004 | 2.648237  | -0.379642 |
| C             | -1.292734 | 1.291226  | 3.123960  |
| H             | -0.194928 | -0.490626 | 2.573741  |
| C             | -1.698764 | 2.570260  | 2.730463  |
| H             | -1.639536 | 4.063793  | 1.163463  |
| H             | -1.566588 | 0.908298  | 4.109360  |
| H             | -2.280738 | 3.193800  | 3.412763  |
| C             | 2.174352  | 0.988515  | -0.721161 |
| C             | 2.831792  | 1.849460  | 0.169356  |
| C             | 2.612393  | 0.883522  | -2.047487 |
| C             | 3.934695  | 2.590025  | -0.263836 |
| H             | 2.467250  | 1.961885  | 1.192750  |
| C             | 3.719857  | 1.618126  | -2.474049 |
| H             | 2.054476  | 0.240102  | -2.733013 |
| C             | 4.382845  | 2.469441  | -1.582830 |
| H             | 4.440135  | 3.267757  | 0.426840  |
| H             | 4.061348  | 1.534413  | -3.507414 |
| H             | 5.243720  | 3.049684  | -1.920473 |
| S             | -1.384910 | -1.283101 | -2.165200 |

|   |           |           |           |
|---|-----------|-----------|-----------|
| O | -1.380380 | -2.726853 | -1.867462 |
| O | -1.700623 | -0.905484 | -3.542755 |
| C | -2.541861 | -0.509053 | -1.076033 |
| C | -3.068296 | 0.777701  | -1.372817 |
| C | -2.838011 | -1.089370 | 0.186780  |
| C | -3.749987 | 1.466190  | -0.408180 |
| H | -2.896259 | 1.210938  | -2.357011 |
| C | -3.525635 | -0.363652 | 1.120151  |
| H | -2.490906 | -2.097851 | 0.406976  |
| H | -4.154442 | 2.466420  | -0.551460 |
| H | -3.764027 | -0.732696 | 2.115755  |
| H | -4.404417 | 1.452411  | 1.552702  |
| N | -3.966084 | 0.899511  | 0.824129  |

2

E = -1855.29868999

| Atomic symbol | x         | y         | z         |
|---------------|-----------|-----------|-----------|
| C             | -0.120654 | -0.102820 | -1.540822 |
| P             | 0.820422  | 0.042903  | -0.251623 |
| C             | 1.791092  | -1.458983 | 0.231055  |
| C             | 1.308398  | -2.666299 | -0.297855 |
| C             | 2.932595  | -1.466682 | 1.045761  |
| C             | 1.950155  | -3.869427 | 0.009595  |
| H             | 0.437833  | -2.634151 | -0.965014 |
| C             | 3.579132  | -2.670830 | 1.343078  |
| H             | 3.323069  | -0.528904 | 1.446379  |
| C             | 3.084772  | -3.874770 | 0.829517  |
| H             | 1.566638  | -4.806661 | -0.400789 |
| H             | 4.471512  | -2.670290 | 1.974545  |
| H             | 3.590159  | -4.815658 | 1.061423  |
| C             | -0.037454 | 0.501812  | 1.310855  |
| C             | -0.840386 | 1.656877  | 1.271621  |
| C             | -0.103981 | -0.333439 | 2.435487  |
| C             | -1.680844 | 1.970693  | 2.337000  |
| H             | -0.826484 | 2.277844  | 0.373308  |
| C             | -0.946409 | -0.015307 | 3.505819  |
| H             | 0.495691  | -1.245143 | 2.465238  |
| C             | -1.735690 | 1.136772  | 3.460494  |
| H             | -2.318883 | 2.855056  | 2.281093  |
| H             | -0.995270 | -0.678620 | 4.373234  |
| H             | -2.407581 | 1.375545  | 4.288011  |
| C             | 2.089948  | 1.355520  | -0.448969 |
| C             | 2.703235  | 1.990670  | 0.639975  |
| C             | 2.414480  | 1.748079  | -1.753591 |
| C             | 3.646731  | 3.001520  | 0.424557  |
| H             | 2.418901  | 1.713460  | 1.658109  |
| C             | 3.365991  | 2.746387  | -1.968664 |
| H             | 1.871737  | 1.264697  | -2.572779 |
| C             | 3.985248  | 3.374924  | -0.879435 |
| H             | 4.111980  | 3.504293  | 1.276247  |
| H             | 3.619010  | 3.047371  | -2.988288 |
| H             | 4.720549  | 4.165589  | -1.048055 |
| S             | -1.465366 | -0.677056 | -2.238764 |
| O             | -1.510821 | -2.157474 | -2.345121 |
| O             | -1.836076 | 0.043516  | -3.471497 |
| C             | -2.735679 | -0.249891 | -1.020374 |
| C             | -3.494191 | 0.917111  | -1.165459 |
| C             | -2.878318 | -1.035085 | 0.132395  |
| C             | -4.389272 | 1.297495  | -0.160742 |

|   |           |           |           |
|---|-----------|-----------|-----------|
| H | -3.364369 | 1.508185  | -2.073746 |
| C | -3.768740 | -0.649880 | 1.134026  |
| H | -2.276976 | -1.940567 | 0.228328  |
| H | -4.979807 | 2.210678  | -0.277184 |
| H | -3.861731 | -1.255337 | 2.038809  |
| H | -5.220929 | 0.821561  | 1.782381  |
| C | -4.530215 | 0.517567  | 0.992386  |

## 3

E= -1379.70190012

| Atomic symbol | x         | y         | z         |
|---------------|-----------|-----------|-----------|
| C             | -1.281724 | -0.643975 | -0.000001 |
| P             | 0.267174  | -0.140280 | 0.000000  |
| C             | 1.185469  | -0.790562 | -1.455501 |
| C             | 0.525685  | -1.700478 | -2.289441 |
| C             | 2.506289  | -0.419783 | -1.748665 |
| C             | 1.175926  | -2.237796 | -3.402718 |
| H             | -0.505031 | -1.964016 | -2.036284 |
| C             | 3.157362  | -0.956608 | -2.861624 |
| H             | 3.025258  | 0.305205  | -1.119667 |
| C             | 2.493992  | -1.868381 | -3.689508 |
| H             | 0.653345  | -2.945518 | -4.049743 |
| H             | 4.184294  | -0.660717 | -3.085533 |
| H             | 3.004115  | -2.287211 | -4.559274 |
| C             | 1.185466  | -0.790563 | 1.455503  |
| C             | 2.506287  | -0.419785 | 1.748669  |
| C             | 0.525682  | -1.700481 | 2.289440  |
| C             | 3.157358  | -0.956612 | 2.861628  |
| H             | 3.025257  | 0.305203  | 1.119672  |
| C             | 1.175921  | -2.237799 | 3.402717  |
| H             | -0.505035 | -1.964018 | 2.036281  |
| C             | 2.493987  | -1.868385 | 3.689510  |
| H             | 4.184290  | -0.660721 | 3.085538  |
| H             | 0.653339  | -2.945522 | 4.049741  |
| H             | 3.004108  | -2.287216 | 4.559276  |
| C             | 0.729090  | 1.646163  | 0.000001  |
| C             | 0.801594  | 2.356897  | -1.209687 |
| C             | 0.801594  | 2.356896  | 1.209691  |
| C             | 0.953963  | 3.745285  | -1.209904 |
| H             | 0.740609  | 1.815285  | -2.156210 |
| C             | 0.953963  | 3.745284  | 1.209910  |
| H             | 0.740609  | 1.815282  | 2.156213  |
| C             | 1.030000  | 4.443784  | 0.000003  |
| H             | 1.015724  | 4.284434  | -2.157557 |
| H             | 1.015724  | 4.284431  | 2.157563  |
| H             | 1.151460  | 5.528610  | 0.000004  |
| C             | -4.884599 | -0.682050 | -0.000005 |
| C             | -4.664162 | 0.660327  | -0.000003 |
| H             | -5.813398 | -1.239823 | -0.000006 |
| H             | -5.363634 | 1.487834  | -0.000003 |
| C             | -2.605596 | -0.362922 | -0.000002 |
| N             | -3.287456 | 0.859589  | -0.000002 |
| N             | -3.645141 | -1.309897 | -0.000004 |
| C             | -3.401704 | -2.733147 | -0.000005 |
| H             | -2.308379 | -2.857985 | -0.000004 |
| H             | -3.825549 | -3.210671 | 0.897445  |
| H             | -3.825547 | -3.210669 | -0.897457 |
| C             | -2.601153 | 2.128666  | 0.000001  |
| H             | -1.956328 | 2.221723  | 0.887124  |



|   |           |          |           |
|---|-----------|----------|-----------|
| H | -1.956327 | 2.221725 | -0.887121 |
| H | -3.342458 | 2.936864 | 0.000001  |

## 4

E= -1339.80978854

| Atomic symbol | x         | y         | z         |
|---------------|-----------|-----------|-----------|
| C             | -1.403617 | 0.469349  | -0.268600 |
| P             | 0.133559  | 0.054983  | -0.065004 |
| C             | 0.679260  | -1.638146 | -0.620736 |
| C             | -0.362359 | -2.553711 | -0.847925 |
| C             | 2.004656  | -2.033770 | -0.866176 |
| C             | -0.074744 | -3.848119 | -1.291617 |
| H             | -1.398149 | -2.230642 | -0.672338 |
| C             | 2.288124  | -3.323897 | -1.326906 |
| H             | 2.823362  | -1.331398 | -0.699441 |
| C             | 1.248780  | -4.236738 | -1.535810 |
| H             | -0.891603 | -4.556422 | -1.453540 |
| H             | 3.323160  | -3.618905 | -1.521886 |
| H             | 1.470132  | -5.246148 | -1.892666 |
| C             | 0.823458  | 0.123687  | 1.651699  |
| C             | 0.983624  | 1.376638  | 2.275410  |
| C             | 0.971584  | -1.036092 | 2.433177  |
| C             | 1.298728  | 1.466614  | 3.630815  |
| H             | 0.849778  | 2.283457  | 1.679641  |
| C             | 1.277094  | -0.947499 | 3.793688  |
| H             | 0.841950  | -2.014081 | 1.964139  |
| C             | 1.446739  | 0.303063  | 4.400605  |
| H             | 1.431163  | 2.448114  | 4.094705  |
| H             | 1.388142  | -1.860675 | 4.385012  |
| H             | 1.686601  | 0.372408  | 5.464302  |
| C             | 1.268414  | 1.203215  | -0.963548 |
| C             | 2.630550  | 1.338896  | -0.659042 |
| C             | 0.722710  | 1.959711  | -2.007177 |
| C             | 3.436220  | 2.218941  | -1.391763 |
| H             | 3.054893  | 0.777360  | 0.176764  |
| C             | 1.524601  | 2.830539  | -2.746569 |
| H             | -0.352622 | 1.843596  | -2.186103 |
| C             | 2.887064  | 2.962458  | -2.440271 |
| H             | 4.494439  | 2.328572  | -1.139371 |
| H             | 1.089843  | 3.416275  | -3.561148 |
| H             | 3.515963  | 3.648648  | -3.013516 |
| C             | -4.728577 | -0.827246 | -0.223518 |
| C             | -4.995635 | 0.526124  | -0.172680 |
| H             | -5.452472 | -1.641707 | -0.241218 |
| H             | -5.921642 | 1.093042  | -0.136631 |
| C             | -2.755788 | 0.145871  | -0.216509 |
| N             | -3.753169 | 1.142972  | -0.166171 |
| N             | -3.378468 | -1.071447 | -0.247262 |
| C             | -3.481786 | 2.555939  | -0.117180 |
| H             | -2.382265 | 2.647260  | -0.110971 |
| H             | -3.891080 | 3.081826  | -0.998400 |
| H             | -3.896113 | 3.019038  | 0.795574  |

## 5

E= -1935.65181984

| Atomic symbol | x         | y         | z         |
|---------------|-----------|-----------|-----------|
| C             | 0.277654  | 0.662601  | -0.368067 |
| P             | -1.262790 | 0.241783  | -0.071651 |
| C             | -1.965433 | -1.083086 | -1.132935 |

|   |           |           |           |
|---|-----------|-----------|-----------|
| C | -1.254793 | -2.295563 | -1.188075 |
| C | -3.097470 | -0.914024 | -1.940735 |
| C | -1.679162 | -3.323420 | -2.028819 |
| H | -0.359396 | -2.422867 | -0.574508 |
| C | -3.514475 | -1.942772 | -2.793290 |
| H | -3.651286 | 0.025595  | -1.909622 |
| C | -2.810478 | -3.148076 | -2.836638 |
| H | -1.124294 | -4.263303 | -2.058804 |
| H | -4.393296 | -1.799257 | -3.425296 |
| H | -3.138419 | -3.950384 | -3.500357 |
| C | -2.428447 | 1.642358  | -0.238819 |
| C | -3.721731 | 1.611910  | 0.303092  |
| C | -1.992781 | 2.774528  | -0.937095 |
| C | -4.576550 | 2.703511  | 0.132861  |
| H | -4.057027 | 0.739457  | 0.867746  |
| C | -2.849138 | 3.864737  | -1.108005 |
| H | -0.968221 | 2.774971  | -1.319843 |
| C | -4.142120 | 3.829175  | -0.575459 |
| H | -5.581217 | 2.679641  | 0.559587  |
| H | -2.506280 | 4.747055  | -1.652343 |
| H | -4.810178 | 4.683123  | -0.704072 |
| C | -1.574576 | -0.374749 | 1.630125  |
| C | -2.506726 | -1.380842 | 1.919209  |
| C | -0.814612 | 0.182797  | 2.669780  |
| C | -2.675396 | -1.825200 | 3.234743  |
| H | -3.088485 | -1.830586 | 1.112377  |
| C | -0.988289 | -0.257068 | 3.982137  |
| H | -0.071376 | 0.945347  | 2.423477  |
| C | -1.919270 | -1.263556 | 4.266824  |
| H | -3.395081 | -2.617124 | 3.451930  |
| H | -0.392704 | 0.180463  | 4.785863  |
| H | -2.049397 | -1.613693 | 5.292645  |
| P | 1.771438  | 0.267714  | -0.859636 |
| C | 2.997392  | 1.522829  | -0.357460 |
| C | 2.566563  | 2.583044  | 0.449672  |
| C | 4.347602  | 1.434907  | -0.729472 |
| C | 3.475674  | 3.552039  | 0.879802  |
| H | 1.506203  | 2.619974  | 0.715185  |
| C | 5.255784  | 2.403664  | -0.296601 |
| H | 4.683183  | 0.610476  | -1.360313 |
| C | 4.821389  | 3.462257  | 0.508684  |
| H | 3.135082  | 4.378906  | 1.506453  |
| H | 6.305902  | 2.333271  | -0.587263 |
| H | 5.533671  | 4.217570  | 0.846908  |
| C | 2.406024  | -1.338108 | -0.237151 |
| C | 1.868971  | -1.823313 | 0.965608  |
| C | 3.370435  | -2.100384 | -0.914476 |
| C | 2.288336  | -3.048683 | 1.484635  |
| H | 1.105931  | -1.233966 | 1.478031  |
| C | 3.782262  | -3.333144 | -0.398582 |
| H | 3.782497  | -1.728463 | -1.853579 |
| C | 3.244858  | -3.808226 | 0.801152  |
| H | 1.862313  | -3.414771 | 2.420810  |
| H | 4.524669  | -3.925833 | -0.937264 |
| H | 3.568263  | -4.770938 | 1.201985  |
| N | 2.171988  | 0.107370  | -2.529692 |
| H | 2.037767  | 1.002357  | -3.007645 |
| H | 1.558574  | -0.581930 | -2.974811 |

6

E = -1935.08236308

| Atomic symbol | x         | y         | z         |
|---------------|-----------|-----------|-----------|
| C             | 0.246362  | 0.600412  | -0.774076 |
| P             | -1.203638 | 0.320481  | -0.149910 |
| C             | -2.413228 | -0.529653 | -1.275255 |
| C             | -1.864677 | -1.055221 | -2.453780 |
| C             | -3.783234 | -0.687616 | -1.022144 |
| C             | -2.676825 | -1.741477 | -3.361548 |
| H             | -0.790803 | -0.913805 | -2.632813 |
| C             | -4.597662 | -1.364748 | -1.935196 |
| H             | -4.220275 | -0.282815 | -0.107234 |
| C             | -4.044239 | -1.895329 | -3.105976 |
| H             | -2.239113 | -2.157210 | -4.272489 |
| H             | -5.665722 | -1.481506 | -1.733073 |
| H             | -4.680173 | -2.427108 | -3.818328 |
| C             | -2.088354 | 1.841960  | 0.390112  |
| C             | -3.162311 | 1.843250  | 1.292440  |
| C             | -1.626297 | 3.058438  | -0.128797 |
| C             | -3.766401 | 3.047637  | 1.669871  |
| H             | -3.507990 | 0.902010  | 1.725617  |
| C             | -2.237222 | 4.259616  | 0.235436  |
| H             | -0.764973 | 3.015493  | -0.804376 |
| C             | -3.309125 | 4.257161  | 1.138131  |
| H             | -4.593099 | 3.042080  | 2.384878  |
| H             | -1.872382 | 5.203819  | -0.176614 |
| H             | -3.781138 | 5.197614  | 1.433026  |
| C             | -1.233612 | -0.762763 | 1.338723  |
| C             | -1.275657 | -2.157746 | 1.174790  |
| C             | -0.917245 | -0.241490 | 2.605031  |
| C             | -1.020576 | -3.008563 | 2.251242  |
| H             | -1.484572 | -2.574067 | 0.187271  |
| C             | -0.677733 | -1.092271 | 3.685812  |
| H             | -0.844528 | 0.841073  | 2.734717  |
| C             | -0.730005 | -2.480696 | 3.513275  |
| H             | -1.029899 | -4.090211 | 2.099810  |
| H             | -0.436546 | -0.671444 | 4.665425  |
| H             | -0.522678 | -3.147294 | 4.353390  |
| P             | 1.718936  | 0.033380  | -1.326715 |
| C             | 2.978141  | 1.279970  | -0.774534 |
| C             | 2.644252  | 2.320062  | 0.102404  |
| C             | 4.293380  | 1.189824  | -1.254946 |
| C             | 3.606429  | 3.256317  | 0.496314  |
| H             | 1.607535  | 2.367786  | 0.450790  |
| C             | 5.259802  | 2.118019  | -0.858200 |
| H             | 4.531074  | 0.389164  | -1.960653 |
| C             | 4.918367  | 3.154971  | 0.019923  |
| H             | 3.334529  | 4.067192  | 1.178207  |
| H             | 6.283096  | 2.039167  | -1.236172 |
| H             | 5.672672  | 3.884385  | 0.327061  |
| C             | 2.164533  | -1.418504 | -0.290087 |
| C             | 2.232550  | -1.294410 | 1.106812  |
| C             | 2.285866  | -2.689818 | -0.867898 |
| C             | 2.415774  | -2.418479 | 1.911841  |
| H             | 2.111913  | -0.307795 | 1.559455  |
| C             | 2.461226  | -3.819015 | -0.060526 |
| H             | 2.228349  | -2.756496 | -1.956947 |
| C             | 2.527840  | -3.687727 | 1.330816  |
| H             | 2.445389  | -2.309430 | 2.998398  |

|   |          |           |           |
|---|----------|-----------|-----------|
| H | 2.547232 | -4.808353 | -0.519278 |
| H | 2.656493 | -4.570686 | 1.962215  |
| N | 1.997251 | -0.467969 | -2.827810 |
| H | 1.644660 | 0.223664  | -3.498295 |

7

E= -1484.13189564

| Atomic symbol | x         | y         | z         |
|---------------|-----------|-----------|-----------|
| C             | 1.305226  | -0.189516 | -0.988402 |
| P             | -0.087616 | -0.031111 | -0.206588 |
| C             | -0.105670 | -0.217714 | 1.633855  |
| C             | 0.308947  | 0.856467  | 2.442789  |
| C             | -0.257797 | -1.481961 | 2.230099  |
| C             | 0.555778  | 0.675322  | 3.804636  |
| H             | 0.450305  | 1.839556  | 1.986809  |
| C             | -0.010718 | -1.666515 | 3.592652  |
| H             | -0.564360 | -2.328279 | 1.610699  |
| C             | 0.397422  | -0.588710 | 4.388162  |
| H             | 0.878027  | 1.522533  | 4.416222  |
| H             | -0.134002 | -2.657704 | 4.037833  |
| H             | 0.595958  | -0.733156 | 5.452840  |
| C             | -1.403675 | -1.236978 | -0.732737 |
| C             | -2.684044 | -1.330053 | -0.168956 |
| C             | -1.048435 | -2.110137 | -1.767089 |
| C             | -3.593020 | -2.290524 | -0.627349 |
| H             | -2.971363 | -0.660898 | 0.644551  |
| C             | -1.955595 | -3.064431 | -2.234944 |
| H             | -0.032510 | -1.999310 | -2.167647 |
| C             | -3.231404 | -3.158398 | -1.663311 |
| H             | -4.586320 | -2.362700 | -0.175687 |
| H             | -1.669038 | -3.742033 | -3.044077 |
| H             | -3.942241 | -3.907071 | -2.023052 |
| C             | -0.969217 | 1.601693  | -0.417224 |
| C             | -2.024295 | 2.064588  | 0.382804  |
| C             | -0.483085 | 2.423733  | -1.441343 |
| C             | -2.582984 | 3.328768  | 0.162090  |
| H             | -2.393794 | 1.447216  | 1.204847  |
| C             | -1.048333 | 3.678974  | -1.677137 |
| H             | 0.364655  | 2.037481  | -2.020355 |
| C             | -2.100896 | 4.136522  | -0.873069 |
| H             | -3.394831 | 3.686707  | 0.801550  |
| H             | -0.662301 | 4.310585  | -2.482069 |
| H             | -2.538061 | 5.123303  | -1.046820 |
| Si            | 3.063143  | -0.223466 | -0.975916 |
| C             | 3.868179  | 1.384734  | -1.634717 |
| H             | 3.574811  | 2.239648  | -1.004348 |
| H             | 4.970969  | 1.331194  | -1.653135 |
| H             | 3.518382  | 1.594174  | -2.658790 |
| C             | 3.831208  | -0.503185 | 0.753119  |
| H             | 3.513781  | 0.295692  | 1.441974  |
| H             | 3.473070  | -1.455375 | 1.175391  |
| H             | 4.934968  | -0.525535 | 0.732997  |
| C             | 3.781403  | -1.607749 | -2.084237 |
| H             | 3.423687  | -1.489852 | -3.120039 |
| H             | 4.885322  | -1.607470 | -2.099117 |
| H             | 3.441161  | -2.593095 | -1.727074 |

8

E= -1167.65886820

| Atomic symbol | x         | y         | z         |
|---------------|-----------|-----------|-----------|
| C             | -0.029737 | -0.115792 | 2.303796  |
| P             | 0.001075  | -0.028148 | 0.698236  |
| C             | -0.242728 | 1.601712  | -0.144681 |
| C             | 0.845516  | 2.446471  | -0.426189 |
| C             | -1.544771 | 2.117537  | -0.284920 |
| C             | 0.639590  | 3.760009  | -0.854322 |
| H             | 1.861871  | 2.064850  | -0.304751 |
| C             | -1.752363 | 3.429438  | -0.712379 |
| H             | -2.399091 | 1.479508  | -0.045763 |
| C             | -0.660454 | 4.258193  | -1.003106 |
| H             | 1.498303  | 4.400219  | -1.073758 |
| H             | -2.771278 | 3.811313  | -0.817357 |
| H             | -0.822265 | 5.286556  | -1.334431 |
| C             | -1.201879 | -1.099217 | -0.247314 |
| C             | -1.568312 | -0.911523 | -1.589123 |
| C             | -1.792294 | -2.142896 | 0.478026  |
| C             | -2.504624 | -1.755743 | -2.195176 |
| H             | -1.137736 | -0.083809 | -2.157487 |
| C             | -2.719559 | -2.994214 | -0.126601 |
| H             | -1.512617 | -2.247039 | 1.531533  |
| C             | -3.078259 | -2.803281 | -1.467151 |
| H             | -2.790257 | -1.594506 | -3.238361 |
| H             | -3.173432 | -3.804165 | 0.450268  |
| H             | -3.810050 | -3.462939 | -1.940177 |
| C             | 1.630904  | -0.586720 | 0.045628  |
| C             | 1.919713  | -0.673859 | -1.324149 |
| C             | 2.609294  | -0.946691 | 0.979037  |
| C             | 3.180130  | -1.103750 | -1.753905 |
| H             | 1.161588  | -0.397817 | -2.059471 |
| C             | 3.867057  | -1.379066 | 0.552496  |
| H             | 2.328251  | -0.867540 | 2.035867  |
| C             | 4.156476  | -1.456584 | -0.816992 |
| H             | 3.400091  | -1.165637 | -2.822930 |
| H             | 4.627010  | -1.656734 | 1.287598  |
| H             | 5.140258  | -1.794299 | -1.152975 |
| C             | -0.662636 | 0.111994  | 3.477868  |
| N             | -1.166165 | 0.274021  | 4.546228  |

9

E = -2111.40693928

| Atomic symbol | x         | y         | z         |
|---------------|-----------|-----------|-----------|
| C             | 0.000000  | -0.000002 | 0.705027  |
| P             | -1.564429 | 0.077249  | 0.285329  |
| P             | 1.564429  | -0.077251 | 0.285329  |
| C             | -2.028270 | 1.562514  | -0.686315 |
| C             | -2.687110 | 0.039845  | 1.725984  |
| C             | 2.028272  | -1.562514 | -0.686319 |
| C             | -2.113314 | -1.321210 | -0.765113 |
| C             | 2.687111  | -0.039849 | 1.725984  |
| C             | 2.113312  | 1.321211  | -0.765110 |
| C             | -1.190380 | 2.681669  | -0.581197 |
| C             | -1.445603 | 3.824739  | -1.339473 |
| C             | -2.540230 | 3.857524  | -2.209967 |
| C             | -3.377503 | 2.742685  | -2.322254 |
| C             | -2.158522 | -0.371404 | 2.955778  |
| C             | -2.980865 | -0.446172 | 4.082342  |
| C             | -3.121867 | 1.596464  | -1.564674 |
| C             | -4.333707 | -0.104425 | 3.984503  |

|   |           |           |           |
|---|-----------|-----------|-----------|
| C | -4.863046 | 0.312749  | 2.758468  |
| C | -4.042832 | 0.383921  | 1.630118  |
| C | 1.190389  | -2.681673 | -0.581198 |
| C | 1.445613  | -3.824741 | -1.339476 |
| C | 2.540236  | -3.857521 | -2.209975 |
| C | 3.377503  | -2.742678 | -2.322265 |
| C | 3.121866  | -1.596459 | -1.564683 |
| C | -1.644880 | -1.377332 | -2.088984 |
| C | -1.836995 | -2.522944 | -2.859063 |
| C | -2.494970 | -3.631877 | -2.313339 |
| C | -2.965229 | -3.583105 | -0.998131 |
| C | -2.778096 | -2.431790 | -0.226534 |
| C | 2.158522  | 0.371398  | 2.955778  |
| C | 2.980866  | 0.446165  | 4.082342  |
| C | 4.333708  | 0.104420  | 3.984502  |
| C | 4.863047  | -0.312752 | 2.758467  |
| C | 4.042833  | -0.383922 | 1.630117  |
| C | 2.778093  | 2.431789  | -0.226529 |
| C | 2.965225  | 3.583108  | -0.998123 |
| C | 2.494962  | 3.631883  | -2.313329 |
| C | 1.836987  | 2.522953  | -2.859055 |
| C | 1.644875  | 1.377338  | -2.088980 |
| H | 1.113074  | 0.519366  | -2.506067 |
| H | 1.463298  | 2.557889  | -3.884131 |
| H | 2.639024  | 4.532182  | -2.913581 |
| H | 3.481217  | 4.444647  | -0.569310 |
| H | 3.139573  | 2.398193  | 0.803047  |
| H | 0.324519  | -2.624944 | 0.081887  |
| H | 0.778413  | -4.685162 | -1.261987 |
| H | 2.736076  | -4.748640 | -2.809744 |
| H | 4.225496  | -2.762007 | -3.009932 |
| H | 3.757495  | -0.715690 | -1.678497 |
| H | 1.095490  | 0.623783  | 2.995902  |
| H | 2.565923  | 0.768957  | 5.039366  |
| H | 4.976495  | 0.158177  | 4.865398  |
| H | 5.917014  | -0.587273 | 2.682760  |
| H | 4.457248  | -0.717148 | 0.676983  |
| H | -3.757502 | 0.715699  | -1.678485 |
| H | -4.225499 | 2.762018  | -3.009917 |
| H | -2.736069 | 4.748645  | -2.809735 |
| H | -0.778399 | 4.685156  | -1.261988 |
| H | -0.324508 | 2.624935  | 0.081883  |
| H | -2.565923 | -0.768966 | 5.039365  |
| H | -1.095491 | -0.623790 | 2.995902  |
| H | -4.457247 | 0.717148  | 0.676984  |
| H | -5.917013 | 0.587272  | 2.682761  |
| H | -4.976495 | -0.158183 | 4.865398  |
| H | -1.113080 | -0.519359 | -2.506069 |
| H | -3.139574 | -2.398197 | 0.803042  |
| H | -3.481221 | -4.444646 | -0.569321 |
| H | -2.639033 | -4.532173 | -2.913594 |
| H | -1.463308 | -2.557878 | -3.884140 |

## 1.4 BP86-D3(BJ)/Def2TZVP, Dissociation structures

**L1**

E = -797.120965110

| Atomic symbol | x        | y        | z         |
|---------------|----------|----------|-----------|
| S             | 1.700228 | 0.000003 | -0.271940 |

|   |           |           |           |
|---|-----------|-----------|-----------|
| O | 2.291402  | 1.285772  | 0.185362  |
| O | 2.291393  | -1.285780 | 0.185338  |
| C | -0.025434 | -0.000001 | 0.120646  |
| C | -0.753358 | -1.221704 | 0.071846  |
| C | -0.753356 | 1.221703  | 0.071837  |
| C | -2.119328 | -1.200789 | -0.003012 |
| H | -0.214912 | -2.168539 | 0.124322  |
| C | -2.119327 | 1.200790  | -0.003022 |
| H | -0.214909 | 2.168538  | 0.124305  |
| H | -2.739914 | -2.095662 | 0.007837  |
| H | -2.739903 | 2.095671  | 0.007816  |
| H | -3.803448 | 0.000000  | -0.092866 |
| N | -2.789727 | 0.000003  | -0.047965 |

**L1+**

E= -796.867899594

| Atomic symbol | x         | y         | z         |
|---------------|-----------|-----------|-----------|
| S             | 1.762317  | 0.000001  | -0.243013 |
| O             | 2.226010  | 1.301087  | 0.249594  |
| O             | 2.226026  | -1.301082 | 0.249589  |
| C             | -0.060446 | -0.000001 | -0.066778 |
| C             | -0.741816 | -1.221469 | -0.042822 |
| C             | -0.741819 | 1.221467  | -0.042832 |
| C             | -2.124718 | -1.194546 | 0.024792  |
| H             | -0.204930 | -2.170250 | -0.056056 |
| C             | -2.124718 | 1.194544  | 0.024797  |
| H             | -0.204923 | 2.170243  | -0.056086 |
| H             | -2.746115 | -2.088374 | 0.063960  |
| H             | -2.746118 | 2.088369  | 0.063980  |
| H             | -3.787808 | -0.000001 | 0.107907  |
| N             | -2.766053 | -0.000002 | 0.055441  |

**L2-**

E = -780.562031224

| Atomic symbol | x         | y         | z         |
|---------------|-----------|-----------|-----------|
| S             | 1.782850  | -0.000002 | -0.353386 |
| O             | 2.171330  | 1.276145  | 0.370197  |
| O             | 2.171331  | -1.276142 | 0.370210  |
| C             | -0.085405 | -0.000002 | -0.110671 |
| C             | -0.785546 | -1.208655 | -0.060718 |
| C             | -0.785544 | 1.208654  | -0.060714 |
| C             | -2.181585 | -1.211745 | 0.036296  |
| H             | -0.205483 | -2.136673 | -0.062394 |
| C             | -2.181582 | 1.211747  | 0.036301  |
| H             | -0.205477 | 2.136669  | -0.062388 |
| H             | -2.728459 | -2.158959 | 0.090879  |
| H             | -2.728455 | 2.158961  | 0.090890  |
| H             | -3.975269 | 0.000004  | 0.155251  |
| C             | -2.884295 | 0.000001  | 0.079287  |

**L2**

E = -780.476096189

| Atomic symbol | x         | y         | z         |
|---------------|-----------|-----------|-----------|
| S             | 1.705674  | 0.000000  | -0.249353 |
| O             | 2.207080  | 1.291879  | 0.260931  |
| O             | 2.207085  | -1.291877 | 0.260923  |
| C             | -0.094302 | -0.000003 | -0.080111 |
| C             | -0.767652 | -1.224190 | -0.053707 |
| C             | -0.767650 | 1.224189  | -0.053712 |

|   |           |           |           |
|---|-----------|-----------|-----------|
| C | -2.161149 | -1.214360 | 0.031904  |
| H | -0.203574 | -2.156644 | -0.076326 |
| C | -2.161145 | 1.214362  | 0.031899  |
| H | -0.203566 | 2.156638  | -0.076338 |
| H | -2.705666 | -2.159120 | 0.070673  |
| H | -2.705662 | 2.159121  | 0.070671  |
| H | -3.944388 | 0.000003  | 0.135383  |
| C | -2.854978 | 0.000001  | 0.072187  |

**L3**

E = -304.928260071

| Atomic symbol | x         | y         | z         |
|---------------|-----------|-----------|-----------|
| C             | -0.681490 | -1.218140 | -0.000000 |
| C             | 0.681490  | -1.218140 | -0.000000 |
| H             | -1.387591 | -2.042003 | 0.000000  |
| H             | 1.387591  | -2.042003 | 0.000000  |
| C             | -0.000000 | 0.987584  | 0.000001  |
| N             | 1.064750  | 0.120222  | 0.000001  |
| N             | -1.064750 | 0.120222  | 0.000000  |
| C             | -2.445918 | 0.574146  | -0.000000 |
| H             | -2.975016 | 0.216168  | 0.895947  |
| H             | -2.428688 | 1.669319  | -0.000001 |
| H             | -2.975014 | 0.216168  | -0.895949 |
| C             | 2.445918  | 0.574146  | -0.000001 |
| H             | 2.428688  | 1.669319  | 0.000004  |
| H             | 2.975017  | 0.216164  | 0.895944  |
| H             | 2.975012  | 0.216172  | -0.895952 |

**L3+**

E= -304.644468108

| Atomic symbol | x         | y         | z         |
|---------------|-----------|-----------|-----------|
| C             | -0.683360 | -1.211720 | 0.000000  |
| C             | 0.683360  | -1.211720 | -0.000002 |
| H             | -1.397144 | -2.028802 | 0.000012  |
| H             | 1.397144  | -2.028802 | 0.000009  |
| C             | 0.000000  | 0.863956  | 0.000015  |
| N             | 1.102985  | 0.123022  | -0.000003 |
| N             | -1.102985 | 0.123022  | -0.000001 |
| C             | -2.491784 | 0.609154  | -0.000004 |
| H             | -3.000913 | 0.243793  | 0.899740  |
| H             | -2.477560 | 1.703588  | 0.000001  |
| H             | -3.000906 | 0.243798  | -0.899755 |
| C             | 2.491784  | 0.609154  | -0.000003 |
| H             | 2.477561  | 1.703588  | -0.000029 |
| H             | 3.000903  | 0.243817  | 0.899757  |
| H             | 3.000916  | 0.243774  | -0.899738 |

**L4-**

E = -265.010089648

| Atomic symbol | x         | y         | z         |
|---------------|-----------|-----------|-----------|
| C             | 1.495370  | 0.578618  | -0.000009 |
| C             | 0.215515  | 1.095871  | 0.000009  |
| H             | 2.431986  | 1.145013  | -0.000006 |
| H             | -0.165399 | 2.116692  | -0.000006 |
| C             | 0.160494  | -1.218352 | 0.000006  |
| N             | -0.602772 | -0.028547 | 0.000016  |
| N             | 1.464437  | -0.805096 | -0.000005 |
| C             | -2.041549 | -0.012670 | -0.000009 |
| H             | -2.359293 | -1.067090 | 0.000022  |



|   |           |          |           |
|---|-----------|----------|-----------|
| H | -2.458981 | 0.490080 | 0.894858  |
| H | -2.458953 | 0.490008 | -0.894928 |

**L4**

E= -264.950527851

| Atomic symbol | x         | y         | z         |
|---------------|-----------|-----------|-----------|
| C             | 1.508481  | 0.570154  | -0.000002 |
| C             | 0.227267  | 1.075003  | 0.000004  |
| H             | 2.453632  | 1.104359  | -0.000010 |
| H             | -0.161243 | 2.088938  | -0.000000 |
| C             | 0.207771  | -1.118107 | 0.000004  |
| N             | -0.621203 | -0.036990 | 0.000008  |
| N             | 1.455265  | -0.826459 | -0.000003 |
| C             | -2.074558 | -0.031828 | -0.000004 |
| H             | -2.423439 | -1.070554 | -0.000024 |
| H             | -2.460586 | 0.475018  | 0.896110  |
| H             | -2.460563 | 0.475043  | -0.896114 |

**L5**

E = -860.897869014

| Atomic symbol | x         | y         | z         |
|---------------|-----------|-----------|-----------|
| P             | 0.068349  | 1.431410  | -0.620820 |
| C             | -1.408185 | 0.380232  | -0.276720 |
| C             | -1.687767 | -0.688174 | -1.148313 |
| C             | -2.301397 | 0.645451  | 0.769580  |
| C             | -2.816422 | -1.485159 | -0.958817 |
| H             | -1.006784 | -0.901310 | -1.976967 |
| C             | -3.438907 | -0.147395 | 0.956389  |
| H             | -2.107353 | 1.482646  | 1.444611  |
| C             | -3.697163 | -1.217030 | 0.096374  |
| H             | -3.014603 | -2.316599 | -1.638311 |
| H             | -4.123849 | 0.071292  | 1.778393  |
| H             | -4.583626 | -1.836999 | 0.241629  |
| C             | 1.411924  | 0.244004  | -0.185034 |
| C             | 2.709354  | 0.561126  | -0.623128 |
| C             | 1.216584  | -0.928132 | 0.561924  |
| C             | 3.788942  | -0.266392 | -0.310659 |
| H             | 2.867336  | 1.467439  | -1.213026 |
| C             | 2.296726  | -1.760322 | 0.869969  |
| H             | 0.213765  | -1.194357 | 0.900233  |
| C             | 3.583924  | -1.431451 | 0.436191  |
| H             | 4.791367  | -0.007285 | -0.657211 |
| H             | 2.131283  | -2.668922 | 1.452729  |
| H             | 4.425895  | -2.084175 | 0.674602  |
| N             | 0.219182  | 2.503422  | 0.704521  |
| H             | -0.231629 | 3.407597  | 0.591005  |
| H             | 0.133007  | 2.145009  | 1.656415  |

**L5+**

E = -860.642940043

| Atomic symbol | x         | y         | z         |
|---------------|-----------|-----------|-----------|
| P             | -0.050558 | 1.150970  | -0.539754 |
| C             | -1.489665 | 0.179341  | -0.147425 |
| C             | -1.357726 | -1.136063 | 0.343630  |
| C             | -2.767060 | 0.729425  | -0.395808 |
| C             | -2.504875 | -1.876273 | 0.618649  |
| H             | -0.369622 | -1.557777 | 0.529389  |
| C             | -3.902229 | -0.021589 | -0.106929 |
| H             | -2.868460 | 1.729563  | -0.822849 |

|   |           |           |           |
|---|-----------|-----------|-----------|
| C | -3.771855 | -1.322591 | 0.396778  |
| H | -2.411565 | -2.887390 | 1.016637  |
| H | -4.891493 | 0.399661  | -0.288557 |
| H | -4.664882 | -1.911292 | 0.611085  |
| C | 1.488833  | 0.308910  | -0.223757 |
| C | 1.861979  | -0.727374 | -1.106216 |
| C | 2.322864  | 0.680035  | 0.850002  |
| C | 3.049649  | -1.417836 | -0.881688 |
| H | 1.227646  | -0.985558 | -1.956828 |
| C | 3.512144  | -0.016026 | 1.052888  |
| H | 2.024389  | 1.481979  | 1.525641  |
| C | 3.874599  | -1.060304 | 0.192557  |
| H | 3.341449  | -2.226810 | -1.552102 |
| H | 4.156792  | 0.251016  | 1.891261  |
| H | 4.810134  | -1.596535 | 0.357725  |
| N | -0.131120 | 2.563783  | 0.338922  |
| H | -1.002705 | 2.806568  | 0.808439  |
| H | 0.424570  | 3.367617  | 0.047922  |

**L6-**

E = -860.309713431

| Atomic symbol | x         | y         | z         |
|---------------|-----------|-----------|-----------|
| P             | -0.032980 | 1.349930  | -0.954553 |
| C             | -1.380997 | 0.201073  | -0.305794 |
| C             | -1.474926 | -1.180281 | -0.565153 |
| C             | -2.436042 | 0.797484  | 0.409849  |
| C             | -2.563612 | -1.933167 | -0.120062 |
| H             | -0.673000 | -1.682749 | -1.111780 |
| C             | -3.531122 | 0.050185  | 0.854826  |
| H             | -2.369924 | 1.874782  | 0.595728  |
| C             | -3.603648 | -1.322753 | 0.594915  |
| H             | -2.601185 | -3.007714 | -0.325661 |
| H             | -4.333714 | 0.541884  | 1.414104  |
| H             | -4.457443 | -1.910939 | 0.941629  |
| C             | 1.386700  | 0.301099  | -0.292177 |
| C             | 1.855388  | -0.848983 | -0.954562 |
| C             | 2.109238  | 0.745731  | 0.827705  |
| C             | 2.966881  | -1.557103 | -0.488381 |
| H             | 1.351939  | -1.181471 | -1.868053 |
| C             | 3.222843  | 0.045965  | 1.299624  |
| H             | 1.784104  | 1.676093  | 1.305750  |
| C             | 3.655316  | -1.116996 | 0.649232  |
| H             | 3.307187  | -2.451540 | -1.019707 |
| H             | 3.761245  | 0.407393  | 2.181769  |
| H             | 4.530657  | -1.662438 | 1.011639  |
| N             | -0.116603 | 2.771037  | -0.161204 |
| H             | -0.225056 | 2.656963  | 0.861161  |

**L6**

E = -860.248419747

| Atomic symbol | x         | y         | z         |
|---------------|-----------|-----------|-----------|
| P             | 0.065280  | 1.266628  | -0.682031 |
| C             | -1.451764 | 0.349330  | -0.225084 |
| C             | -2.054076 | -0.525963 | -1.142664 |
| C             | -2.034889 | 0.540704  | 1.038998  |
| C             | -3.212975 | -1.222453 | -0.791150 |
| H             | -1.616395 | -0.653527 | -2.135631 |
| C             | -3.198657 | -0.149451 | 1.381497  |
| H             | -1.564506 | 1.225258  | 1.747608  |

|   |           |           |           |
|---|-----------|-----------|-----------|
| C | -3.786320 | -1.033913 | 0.470054  |
| H | -3.675344 | -1.905283 | -1.506409 |
| H | -3.646542 | -0.002049 | 2.366254  |
| H | -4.695928 | -1.572525 | 0.741842  |
| C | 1.455183  | 0.202459  | -0.210994 |
| C | 1.355442  | -1.197299 | -0.276287 |
| C | 2.675359  | 0.797726  | 0.154028  |
| C | 2.460509  | -1.991807 | 0.032545  |
| H | 0.407602  | -1.665860 | -0.547824 |
| C | 3.774230  | -0.004596 | 0.463375  |
| H | 2.738438  | 1.885438  | 0.209709  |
| C | 3.672339  | -1.398698 | 0.401202  |
| H | 2.372961  | -3.079155 | -0.009168 |
| H | 4.716383  | 0.461713  | 0.758212  |
| H | 4.535301  | -2.022035 | 0.642167  |
| N | 0.292922  | 2.690131  | 0.033790  |
| H | -0.527897 | 3.301438  | -0.045951 |

**L7-**

E = -409.330349942

| Atomic symbol | x         | y         | z         |
|---------------|-----------|-----------|-----------|
| Si            | -0.000003 | 0.000000  | -0.703103 |
| C             | 0.765438  | -1.513206 | 0.297704  |
| H             | 1.832663  | -1.657229 | 0.048659  |
| H             | 0.693207  | -1.370327 | 1.397546  |
| H             | 0.249057  | -2.458240 | 0.048711  |
| C             | 0.927762  | 1.419488  | 0.297704  |
| H             | 2.004372  | 1.444813  | 0.048696  |
| H             | 0.518871  | 2.415745  | 0.048673  |
| H             | 0.840162  | 1.285479  | 1.397548  |
| C             | -1.693197 | 0.093718  | 0.297708  |
| H             | -2.351541 | -0.758509 | 0.048652  |
| H             | -1.533345 | 0.084824  | 1.397551  |
| H             | -2.253425 | 1.013438  | 0.048717  |

**L7**

E = -409.302934261

| Atomic symbol | x         | y         | z         |
|---------------|-----------|-----------|-----------|
| Si            | 0.000001  | 0.000002  | -0.426861 |
| C             | 1.577810  | 0.852383  | 0.177314  |
| H             | 1.631153  | 1.892389  | -0.176444 |
| H             | 1.607907  | 0.868599  | 1.281088  |
| H             | 2.476882  | 0.326946  | -0.176503 |
| C             | -1.527092 | 0.940231  | 0.177313  |
| H             | -1.521609 | 1.981558  | -0.176537 |
| H             | -2.454436 | 0.466399  | -0.176407 |
| H             | -1.556159 | 0.958222  | 1.281088  |
| C             | -0.050719 | -1.792616 | 0.177312  |
| H             | 0.823296  | -2.358806 | -0.176421 |
| H             | -0.051754 | -1.826795 | 1.281087  |
| H             | -0.955282 | -2.308525 | -0.176531 |

**L8-**

E = -92.8905318756

| Atomic symbol | x         | y         | z         |
|---------------|-----------|-----------|-----------|
| C             | -0.000000 | -0.000000 | -0.636718 |
| N             | 0.000000  | 0.000000  | 0.545759  |

**L8**

E = -92.7525610350

| Atomic symbol | x         | y         | z         |
|---------------|-----------|-----------|-----------|
| C             | 0.000000  | 0.000000  | -0.632815 |
| N             | -0.000000 | -0.000000 | 0.542413  |

**L9**

E = -1036.65693680

| Atomic symbol | x         | y         | z         |
|---------------|-----------|-----------|-----------|
| P             | 0.000762  | 0.000048  | -1.280953 |
| C             | -1.070775 | 1.246092  | -0.450271 |
| C             | -1.872242 | 0.972964  | 0.668874  |
| C             | -1.071975 | 2.546312  | -0.986038 |
| C             | -2.652056 | 1.981027  | 1.243453  |
| H             | -1.883432 | -0.031950 | 1.093244  |
| C             | -1.838730 | 3.555706  | -0.402203 |
| H             | -0.462018 | 2.764622  | -1.866521 |
| C             | -2.633825 | 3.274227  | 0.714254  |
| H             | -3.272519 | 1.754535  | 2.113064  |
| H             | -1.823889 | 4.562425  | -0.824516 |
| H             | -3.241674 | 4.060350  | 1.165934  |
| C             | -0.543901 | -1.550499 | -0.450729 |
| C             | -1.670783 | -2.199512 | -0.985480 |
| C             | 0.094902  | -2.109715 | 0.666328  |
| C             | -2.163060 | -3.367572 | -0.401035 |
| H             | -2.164930 | -1.778899 | -1.865153 |
| C             | -0.389334 | -3.288532 | 1.241115  |
| H             | 0.972842  | -1.618689 | 1.088705  |
| C             | -1.520848 | -3.916966 | 0.713948  |
| H             | -3.043716 | -3.856497 | -0.822342 |
| H             | 0.117629  | -3.714049 | 2.109649  |
| H             | -1.898704 | -4.835865 | 1.166027  |
| C             | 1.615655  | 0.304303  | -0.450486 |
| C             | 1.778996  | 1.133189  | 0.670373  |
| C             | 2.742347  | -0.343245 | -0.987269 |
| C             | 3.041526  | 1.303748  | 1.245427  |
| H             | 0.913969  | 1.645415  | 1.094371  |
| C             | 3.999713  | -0.184561 | -0.402908 |
| H             | 2.626668  | -0.978631 | -1.869221 |
| C             | 4.152897  | 0.642636  | 0.714986  |
| H             | 3.155432  | 1.952746  | 2.116214  |
| H             | 4.864454  | -0.699079 | -0.826645 |
| H             | 5.137414  | 0.775220  | 1.167447  |

**L9+**

E = -1036.40388816

| Atomic symbol | x         | y         | z         |
|---------------|-----------|-----------|-----------|
| P             | 0.000060  | 0.000021  | -0.714586 |
| C             | -0.750738 | 1.545580  | -0.252741 |
| C             | -1.898152 | 1.589722  | 0.567528  |
| C             | -0.189266 | 2.739811  | -0.759686 |
| C             | -2.455311 | 2.822815  | 0.895640  |
| H             | -2.328235 | 0.668207  | 0.960399  |
| C             | -0.756156 | 3.963483  | -0.418240 |
| H             | 0.679471  | 2.702102  | -1.419641 |
| C             | -1.888611 | 4.006319  | 0.405839  |
| H             | -3.331511 | 2.863301  | 1.543910  |
| H             | -0.323987 | 4.887198  | -0.804492 |
| H             | -2.334355 | 4.967828  | 0.664338  |
| C             | -0.963110 | -1.422893 | -0.252777 |

|   |           |           |           |
|---|-----------|-----------|-----------|
| C | -2.277944 | -1.533824 | -0.760048 |
| C | -0.427861 | -2.438574 | 0.567722  |
| C | -3.054357 | -2.636551 | -0.418634 |
| H | -2.679382 | -0.762731 | -1.420285 |
| C | -1.217330 | -3.537535 | 0.895905  |
| H | 0.585123  | -2.350313 | 0.960891  |
| C | -2.525480 | -3.638549 | 0.405784  |
| H | -4.070300 | -2.724207 | -0.805139 |
| H | -0.814466 | -4.316448 | 1.544453  |
| H | -3.135435 | -4.505245 | 0.664245  |
| C | 1.713876  | -0.122691 | -0.252593 |
| C | 2.326069  | 0.849078  | 0.567350  |
| C | 2.467211  | -1.206272 | -0.759341 |
| C | 3.672576  | 0.714965  | 0.895236  |
| H | 1.743183  | 1.682407  | 0.960163  |
| C | 3.810450  | -1.327217 | -0.418130 |
| H | 1.999977  | -1.940022 | -1.418863 |
| C | 4.414016  | -0.367689 | 0.405520  |
| H | 4.145868  | 1.453568  | 1.543382  |
| H | 4.394191  | -2.163487 | -0.804265 |
| H | 5.469656  | -0.462344 | 0.663705  |

## 2. Canonical Orbitals

HOMO (left), HOMO-1 (right) for 1-9. Orbitals are taken from BP86-D3(BJ)/Def2TZVP calculations.

1:

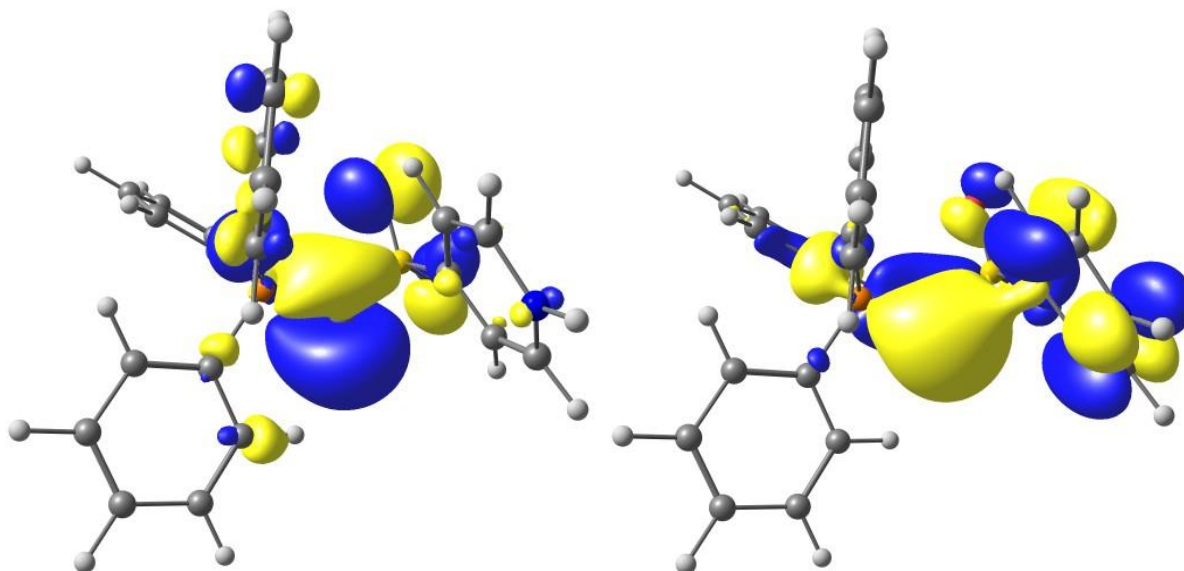

2:

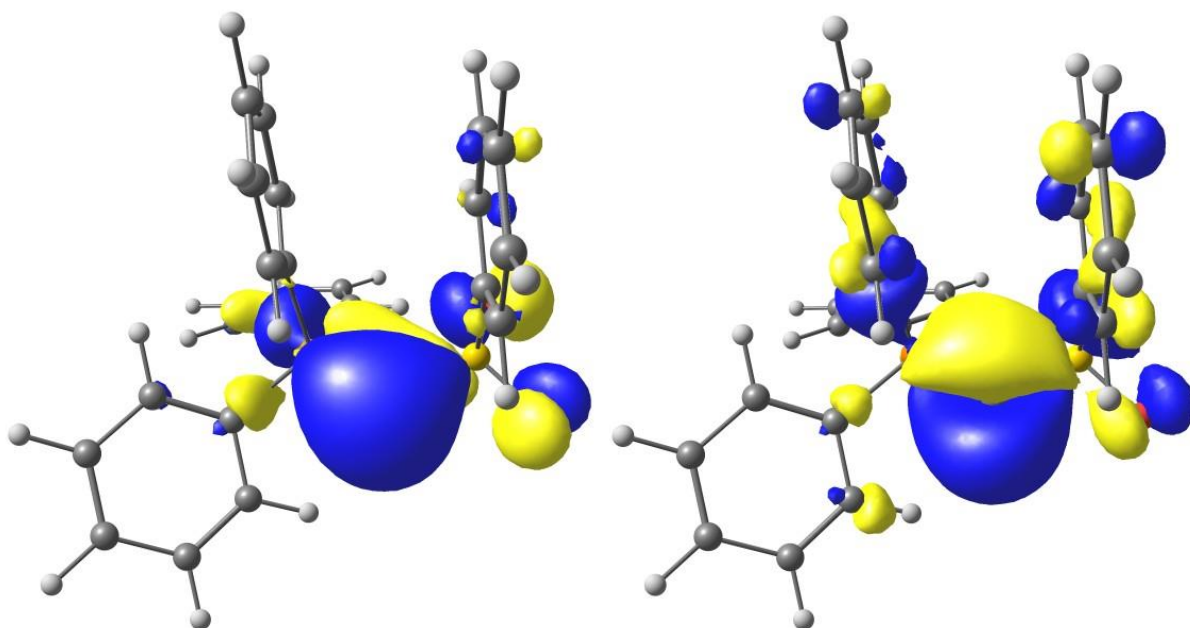

3:

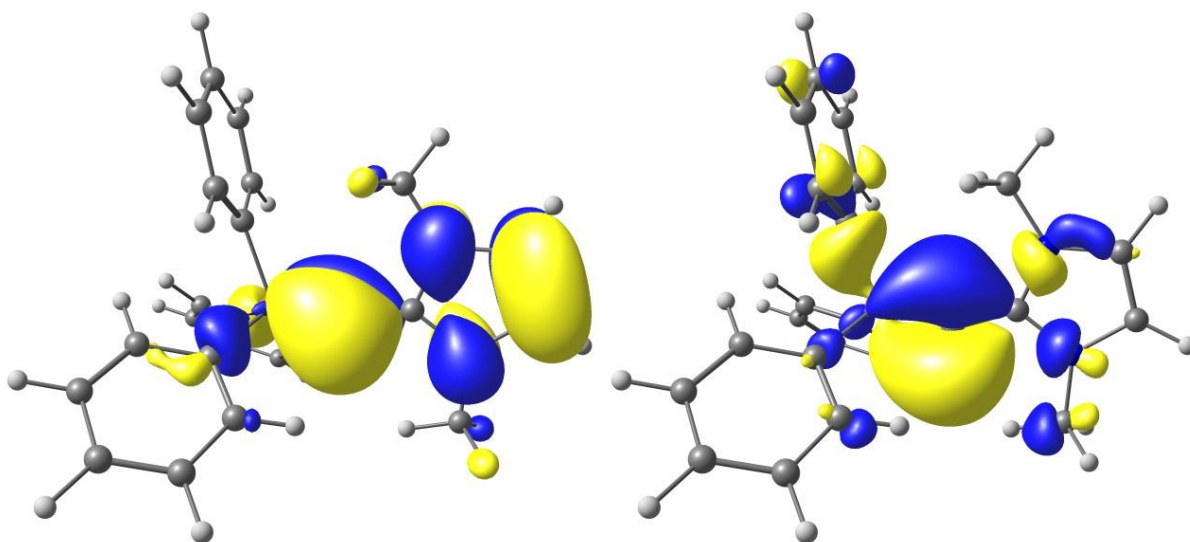

4:

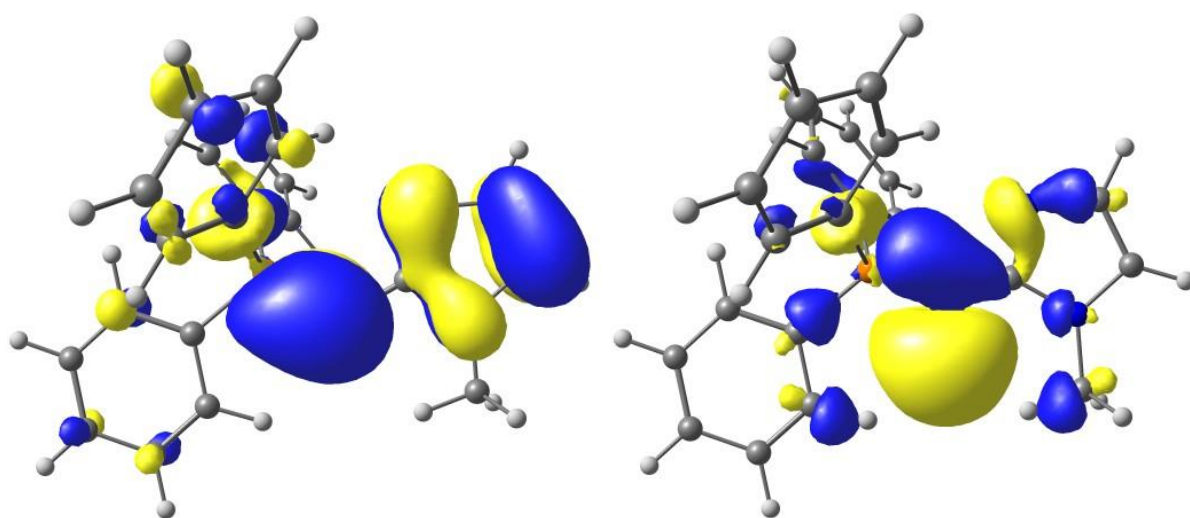

5:

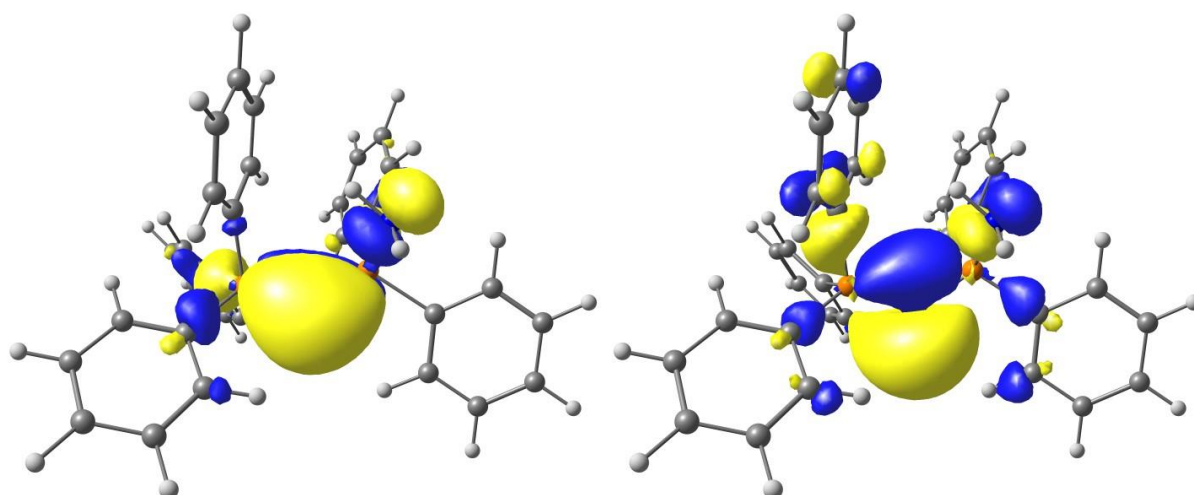

6:

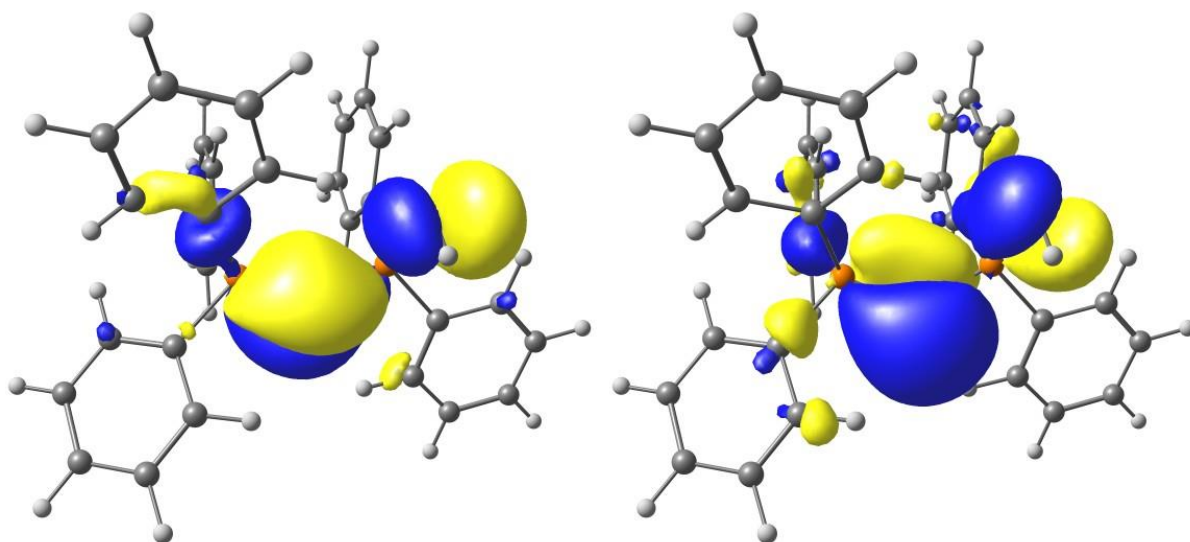

7:

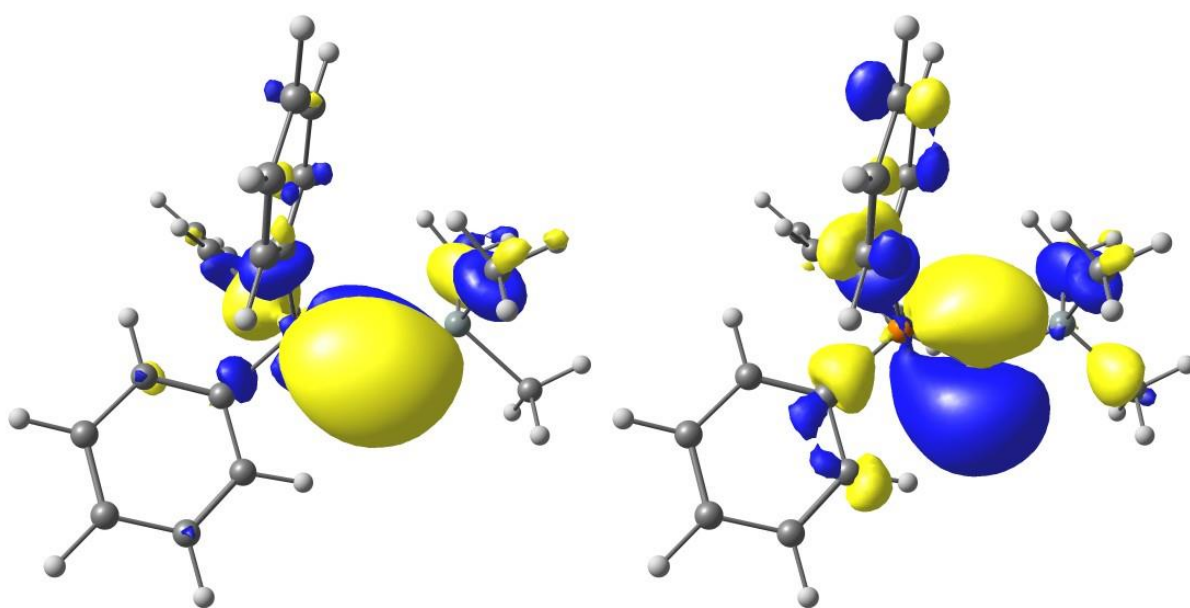



8:

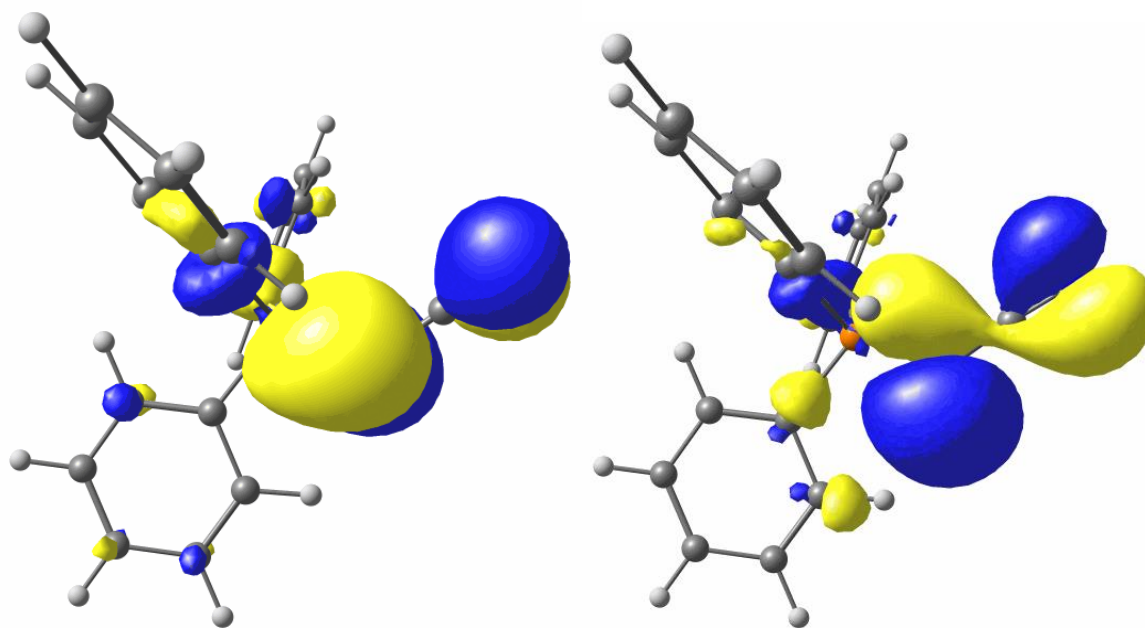

9:

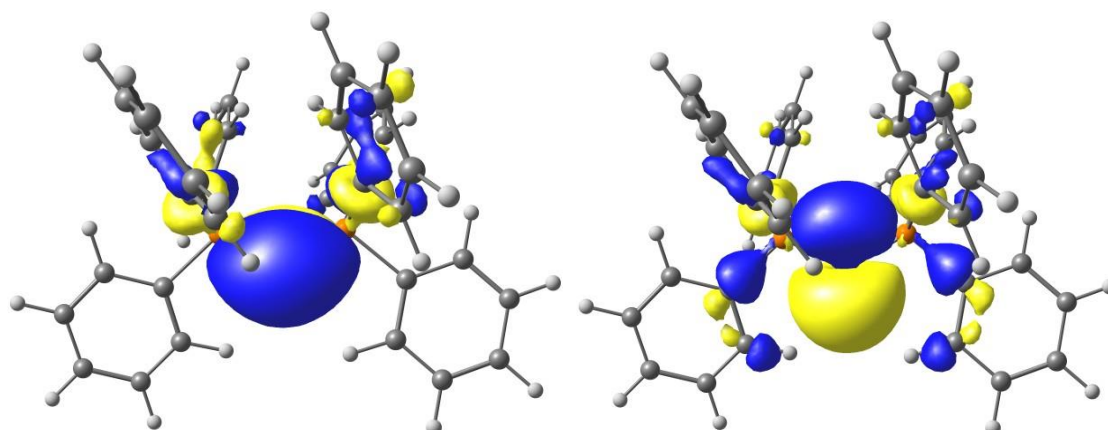

### 3. EDA tables

All energies are given in kcal/mol and taken from BP86/TZ2P ADF calculations.

| 3                                      | dada   | dodo   | ylyl   | yldo   | doyl   | dayl   | ylda   | dado   | doda   |
|----------------------------------------|--------|--------|--------|--------|--------|--------|--------|--------|--------|
| $\Delta E_{\text{Int}}$                | -199.5 | -482.0 | -669.0 | -388.7 | -441.9 | -352.7 | -336.8 | -250.2 | -287.5 |
| $\Delta E_{\text{Pauli}}$              | 951.5  | 476.4  | 1044.8 | 945.0  | 917.5  | 785.4  | 932.6  | 747.5  | 873.0  |
| $\Delta E_{\text{elstat}}$             | -401.5 | -380.4 | -953.1 | -642.3 | -655.0 | -457.5 | -516.8 | -307.7 | -382.0 |
| $\Delta E_{\text{Orb}}$                | -749.5 | -578.0 | -760.7 | -691.4 | -704.4 | -680.6 | -752.6 | -690.0 | -778.5 |
| $\Delta E_{\text{prep}}(\text{PPh}_3)$ | 0.9    | 128.1  | 14.4   | 14.4   | 128.1  | 0.9    | 14.4   | 0.9    | 128.1  |
| $\Delta E_{\text{prep}}(\text{L})$     | 2.7    | 91.4   | 10.1   | 91.4   | 10.1   | 10.1   | 2.7    | 91.4   | 2.7    |
| $\Delta E_{\text{prep}}(\text{C})$     | 43.5   | 100.8  | 0.0    | 0.0    | 0.0    | 41.0   | 41.0   | 0.0    | 0.0    |
| $\Delta E_{\text{prep}}$               | 47.1   | 320.3  | 24.4   | 105.8  | 138.1  | 52.0   | 58.0   | 92.3   | 130.8  |



| BDE                                    | 152.5  | 152.5  | 640.2  | 277.1  | 297.2  | 297.2  | 277.1  | 152.5  | 152.5  |
|----------------------------------------|--------|--------|--------|--------|--------|--------|--------|--------|--------|
| 4                                      | dada   | dodo   | ylyl   | yldo   | doyl   | dayl   | ylda   | dado   | doda   |
| $\Delta E_{\text{Int}}$                | -219.4 | -487.1 | -548.7 | -396.4 | -319.0 | -232.6 | -356.7 | -258.1 | -304.7 |
| $\Delta E_{\text{Pauli}}$              | 866.7  | 517.6  | 1018.4 | 928.9  | 914.8  | 797.3  | 931.5  | 761.3  | 874.9  |
| $\Delta E_{\text{elstat}}$             | -399.4 | -400.0 | -797.9 | -605.3 | -555.4 | -411.3 | -535.5 | -367.3 | -448.0 |
| $\Delta E_{\text{Orb}}$                | -686.8 | -604.6 | -769.2 | -720.0 | -678.3 | -618.5 | -752.7 | -652.0 | -731.7 |
| $\Delta E_{\text{prep}}(\text{PPh}_3)$ | 0.7    | 127.4  | 14.2   | 14.2   | 127.4  | 0.7    | 14.2   | 0.7    | 127.4  |
| $\Delta E_{\text{prep}}(\text{L})$     | 0.9    | 75.3   | 7.6    | 75.3   | 7.6    | 7.6    | 0.9    | 75.3   | 0.9    |
| $\Delta E_{\text{prep}}(\text{C})$     | 43.5   | 100.8  | 0.0    | 0.0    | 0.0    | 41.0   | 41.0   | 0.0    | 0.0    |
| $\Delta E_{\text{prep}}$               | 45.2   | 303.5  | 21.8   | 89.5   | 135.0  | 49.3   | 56.1   | 76.0   | 128.3  |
| BDE                                    | 174.4  | 174.4  | 522.4  | 299.0  | 179.4  | 179.4  | 299.0  | 174.4  | 174.4  |
| 5                                      | dada   | dodo   | ylyl   | yldo   | doyl   | dayl   | ylda   | dado   | doda   |
| $\Delta E_{\text{Int}}$                | -181.4 | -470.1 | -628.1 | -376.2 | -401.6 | -314.4 | -316.3 | -240.3 | -267.6 |
| $\Delta E_{\text{Pauli}}$              | 786.3  | 580.0  | 1048.6 | 968.3  | 934.5  | 818.5  | 841.5  | 798.1  | 788.2  |
| $\Delta E_{\text{elstat}}$             | -357.0 | -414.1 | -988.5 | -695.8 | -683.1 | -548.9 | -550.2 | -390.4 | -385.6 |
| $\Delta E_{\text{Orb}}$                | -610.7 | -636.1 | -688.2 | -648.7 | -652.9 | -584.0 | -607.6 | -647.9 | -670.3 |
| $\Delta E_{\text{prep}}(\text{PPh}_3)$ | 1.0    | 124.9  | 11.9   | 11.9   | 124.9  | 1.0    | 11.9   | 1.0    | 124.9  |
| $\Delta E_{\text{prep}}(\text{L})$     | 4.2    | 103.8  | 10.2   | 103.8  | 10.2   | 10.2   | 4.2    | 103.8  | 4.2    |
| $\Delta E_{\text{prep}}(\text{C})$     | 43.5   | 100.8  | 0.0    | 0.0    | 0.0    | 41.0   | 41.0   | 0.0    | 0.0    |
| $\Delta E_{\text{prep}}$               | 48.7   | 329.5  | 22.1   | 115.7  | 135.1  | 52.2   | 57.1   | 104.7  | 129.0  |
| BDE                                    | 133.0  | 133.0  | 603.4  | 257.6  | 260.4  | 260.4  | 257.6  | 133.0  | 133.0  |
| 6                                      | dada   | dodo   | ylyl   | yldo   | doyl   | dayl   | ylda   | dado   | doda   |
| $\Delta E_{\text{Int}}$                | -190.5 | -478.2 | -513.7 | -388.4 | -283.0 | -197.0 | -328.2 | -249.6 | -275.4 |
| $\Delta E_{\text{Pauli}}$              | 776.6  | 662.1  | 1052.2 | 1036.8 | 950.5  | 798.7  | 822.9  | 849.5  | 900.2  |
| $\Delta E_{\text{elstat}}$             | -351.7 | -481.7 | -861.9 | -713.6 | -597.5 | -437.6 | -507.7 | -432.4 | -463.2 |
| $\Delta E_{\text{Orb}}$                | -615.5 | -658.5 | -703.9 | -711.6 | -636.1 | -558.2 | -643.4 | -666.6 | -712.4 |
| $\Delta E_{\text{prep}}(\text{PPh}_3)$ | 0.3    | 123.6  | 14.3   | 14.3   | 123.6  | 0.3    | 14.3   | 0.3    | 123.6  |
| $\Delta E_{\text{prep}}(\text{L})$     | 3.2    | 99.2   | 3.8    | 99.2   | 3.8    | 3.8    | 3.2    | 99.2   | 3.2    |
| $\Delta E_{\text{prep}}(\text{C})$     | 43.5   | 100.8  | 0.0    | 0.0    | 0.0    | 41.0   | 41.0   | 0.0    | 0.0    |
| $\Delta E_{\text{prep}}$               | 47.1   | 323.6  | 18.1   | 113.5  | 127.4  | 45.2   | 58.5   | 99.5   | 126.8  |
| BDE                                    | 143.5  | 143.5  | 492.8  | 268.1  | 149.7  | 149.7  | 268.1  | 143.5  | 143.5  |

| 7                                      | dada   | dodo   | yllyl  | ylldo  | doysl  | dayl   | yllda  | dado   | doda   |
|----------------------------------------|--------|--------|--------|--------|--------|--------|--------|--------|--------|
| $\Delta E_{\text{Int}}$                | -218.0 | -466.0 | -522.1 | -375.9 | -291.9 | -202.7 | -358.6 | -234.2 | -306.1 |
| $\Delta E_{\text{Pauli}}$              | 775.5  | 465.5  | 901.0  | 849.2  | 791.0  | 680.2  | 815.0  | 682.1  | 773.2  |
| $\Delta E_{\text{elstat}}$             | -369.2 | -375.0 | -792.8 | -598.6 | -530.0 | -388.0 | -499.0 | -334.5 | -399.2 |
| $\Delta E_{\text{Orb}}$                | -624.3 | -556.6 | -630.3 | -626.5 | -552.8 | -494.9 | -674.6 | -581.9 | -680.1 |
| $\Delta E_{\text{prep}}(\text{PPh}_3)$ | 1.3    | 128.4  | 18.1   | 18.1   | 128.4  | 1.3    | 18.1   | 1.3    | 128.4  |
| $\Delta E_{\text{prep}}(\text{L})$     | 4.2    | 60.9   | 3.0    | 60.9   | 3.0    | 3.0    | 4.2    | 60.9   | 4.2    |
| $\Delta E_{\text{prep}}(\text{C})$     | 43.5   | 100.8  | 0.0    | 0.0    | 0.0    | 41.0   | 41.0   | 0.0    | 0.0    |
| $\Delta E_{\text{prep}}$               | 49.0   | 290.2  | 21.1   | 79.0   | 131.5  | 45.3   | 63.3   | 62.2   | 132.6  |
| BDE                                    | 169.1  | 169.1  | 498.3  | 293.7  | 155.3  | 155.3  | 293.7  | 169.1  | 169.1  |

| 8                                      | dada   | dodo   | yllyl  | ylldo  | doysl  | dayl   | yllda  | dado   | doda   |
|----------------------------------------|--------|--------|--------|--------|--------|--------|--------|--------|--------|
| $\Delta E_{\text{Int}}$                | -205.7 | -526.3 | -572.4 | -435.2 | -343.1 | -256.0 | -343.2 | -296.6 | -291.7 |
| $\Delta E_{\text{Pauli}}$              | 842.4  | 509.4  | 950.8  | 918.2  | 864.3  | 753.6  | 886.6  | 766.4  | 834.1  |
| $\Delta E_{\text{elstat}}$             | -374.4 | -396.4 | -769.9 | -573.1 | -527.2 | -387.4 | -485.1 | -363.3 | -404.2 |
| $\Delta E_{\text{Orb}}$                | -673.7 | -639.2 | -753.3 | -780.4 | -680.1 | -622.2 | -744.7 | -699.7 | -721.6 |
| $\Delta E_{\text{prep}}(\text{PPh}_3)$ | 0.6    | 127.5  | 14.4   | 14.4   | 127.5  | 0.6    | 14.4   | 0.6    | 127.5  |
| $\Delta E_{\text{prep}}(\text{L})$     | 0.1    | 131.0  | 0.4    | 131.0  | 0.4    | 0.4    | 0.1    | 131.0  | 0.1    |
| $\Delta E_{\text{prep}}(\text{C})$     | 43.5   | 100.8  | 0.0    | 0.0    | 0.0    | 41.0   | 41.0   | 0.0    | 0.0    |
| $\Delta E_{\text{prep}}$               | 44.3   | 359.2  | 14.8   | 145.3  | 127.9  | 42.1   | 55.5   | 131.6  | 127.6  |
| BDE                                    | 161.5  | 161.5  | 554.4  | 286.1  | 211.4  | 211.4  | 286.1  | 161.5  | 161.5  |

| 9                                      | dada   | dodo   | yllyl  | ylldo  | doysl  | dayl   | yllda  | dado   | doda   |
|----------------------------------------|--------|--------|--------|--------|--------|--------|--------|--------|--------|
| $\Delta E_{\text{Int}}$                | -170.6 | -486.3 | -618.0 | -392.0 | -392.0 | -304.9 | -304.9 | -256.6 | -256.6 |
| $\Delta E_{\text{Pauli}}$              | 770.4  | 571.1  | 1054.4 | 950.6  | 950.6  | 820.1  | 820.1  | 779.1  | 779.1  |
| $\Delta E_{\text{elstat}}$             | -341.4 | -403.6 | -970.7 | -678.1 | -678.1 | -532.8 | -532.8 | -373.2 | -373.2 |
| $\Delta E_{\text{Orb}}$                | -599.6 | -653.8 | -701.8 | -664.5 | -664.5 | -592.2 | -592.2 | -662.6 | -662.6 |
| $\Delta E_{\text{prep}}(\text{PPh}_3)$ | 1.1    | 126.7  | 11.5   | 11.5   | 126.7  | 1.1    | 11.5   | 1.1    | 126.7  |
| $\Delta E_{\text{prep}}(\text{L})$     | 1.1    | 126.7  | 11.5   | 126.7  | 11.5   | 11.5   | 1.1    | 126.7  | 1.1    |
| $\Delta E_{\text{prep}}(\text{C})$     | 43.5   | 100.8  | 0.0    | 0.0    | 0.0    | 41.0   | 41.0   | 0.0    | 0.0    |
| $\Delta E_{\text{prep}}$               | 45.7   | 354.2  | 23.0   | 138.2  | 138.2  | 53.6   | 53.6   | 127.8  | 127.8  |
| BDE                                    | 124.9  | 124.9  | 592.5  | 249.5  | 249.5  | 249.5  | 249.5  | 124.9  | 124.9  |

#### 4. Nalewajski-Mrozek bond orders and NBO analysis data

Nalewajski-Mrozek bond orders

|   | L                                | NMBI |      |
|---|----------------------------------|------|------|
|   |                                  | C-P  | C-E  |
| 1 | SO <sub>2</sub> PyH              | 1.30 | 1.03 |
| 2 | SO <sub>2</sub> Ph <sup>-</sup>  | 1.57 | 1.12 |
| 3 | IMe                              | 1.46 | 1.80 |
| 4 | IMe <sup>-</sup>                 | 1.48 | 1.56 |
| 5 | PPh <sub>2</sub> NH <sub>2</sub> | 1.48 | 1.48 |
| 6 | PPh <sub>2</sub> NH <sup>-</sup> | 1.62 | 1.24 |
| 7 | SiMe <sub>3</sub> <sup>-</sup>   | 1.72 | 1.25 |
| 8 | CN <sup>-</sup>                  | 1.39 | 1.67 |
| 9 | PPh <sub>3</sub>                 | 1.47 | 1.47 |

NBO analysis data

|   | L                                | Occ  | C-P( $\sigma$ ) |      | C-P( $\pi$ ) |      | C-E( $\sigma$ ) |      |      | C-E( $\pi$ ) |      |
|---|----------------------------------|------|-----------------|------|--------------|------|-----------------|------|------|--------------|------|
|   |                                  |      | %(C)            | %(s) | Occ          | %(C) | Occ             | %(C) | %(s) | Occ          | %(C) |
| 1 | SO <sub>2</sub> PyH              | 1.96 | 55.4            | 28.6 |              |      | 1.96            | 50.5 | 24.3 |              |      |
| 2 | SO <sub>2</sub> Ph <sup>-</sup>  | 1.96 | 55.8            | 30.7 | 1.63         | 87.6 | 1.97            | 50.6 | 26.0 |              |      |
| 3 | IMe                              | 1.96 | 58.1            | 37.3 |              |      | 1.98            | 46.8 | 45.8 | 1.84         | 61.9 |
| 4 | IMe <sup>-</sup>                 | 1.95 | 55.2            | 28.5 |              |      | 1.97            | 46.4 | 35.5 |              |      |
| 5 | PPh <sub>2</sub> NH <sub>2</sub> | 1.96 | 57.2            | 30.9 |              |      | 1.96            | 58.2 | 31.8 | 1.65         | 88.9 |
| 6 | PPh <sub>2</sub> NH <sup>-</sup> | 1.96 | 56.7            | 32.1 | 1.64         | 87.2 | 1.95            | 59.4 | 31.2 |              |      |
| 7 | SiMe <sub>3</sub> <sup>-</sup>   | 1.96 | 55.8            | 31.0 | 1.66         | 84.4 | 1.92            | 70.4 | 27.6 |              |      |
| 8 | CN <sup>-</sup>                  | 1.92 | 59.7            | 49.7 | 1.64         | 88.7 | 1.99            | 49.0 | 41.8 |              |      |
| 9 | PPh <sub>3</sub>                 | 1.96 | 57.5            | 30.5 | 1.62         | 90.4 | 1.96            | 57.4 | 30.4 |              |      |
